# Supplementary material for: A roadmap of brain recovery in a mouse model of concussion: insights from neuroimaging
Source: PubMed Central journal article supplement (PMC7789702; doi:10.1186/s40478-020-01098-y), 2021-01-06

**Component 003**

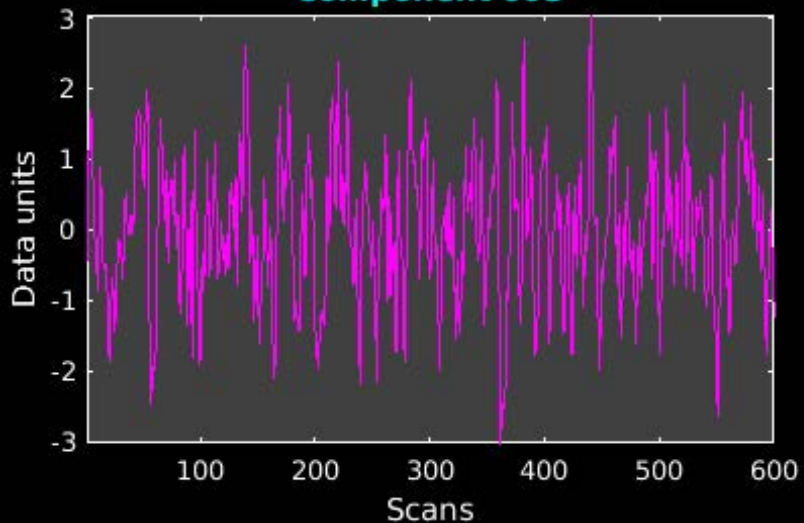

**Dynamic range: 0.018, Power<sub>LF</sub>/Power<sub>HF</sub>: 4.441**

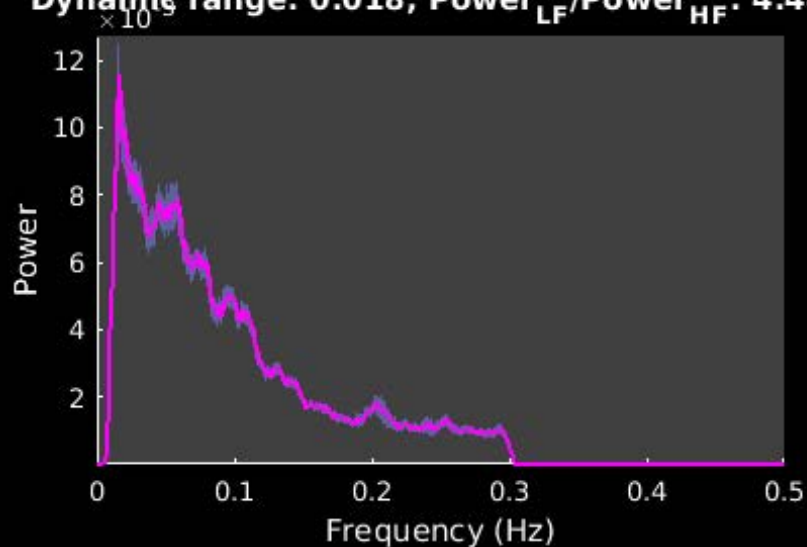

**IVA\_100ICs\_mean\_component\_ica\_s\_all\_3**

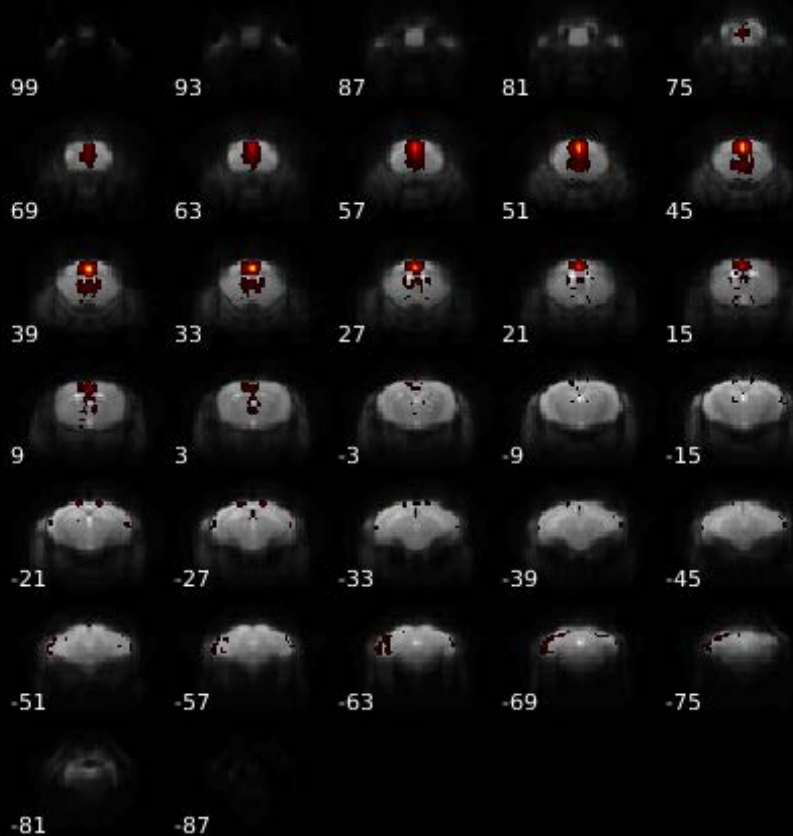

**Peak Coordinates (mm)  
(0,108,45)**

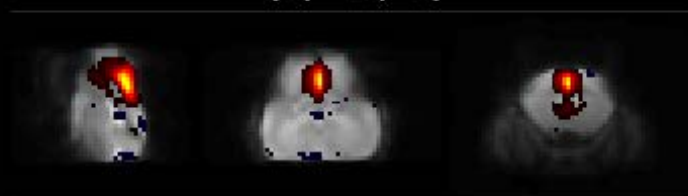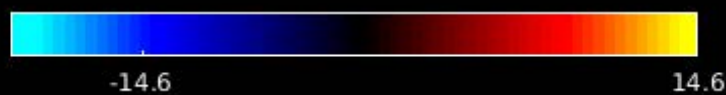

### Component 006

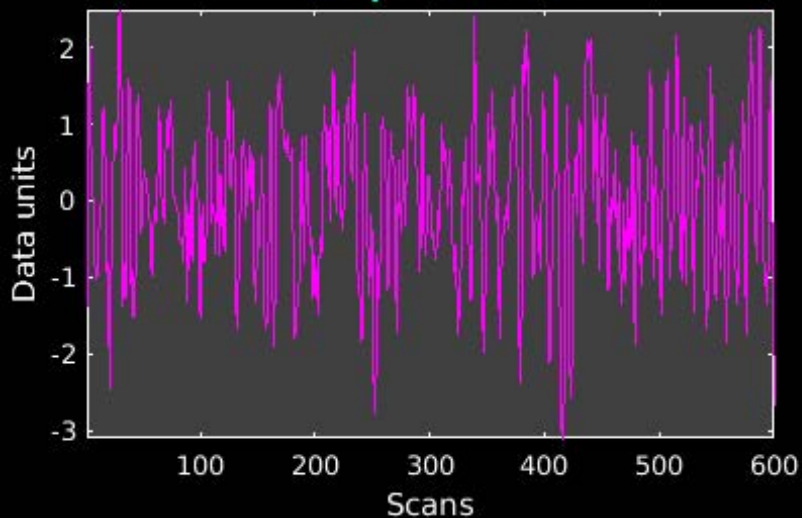

Dynamic range: 0.015,  $\text{Power}_{\text{LF}}/\text{Power}_{\text{HF}}$ : 2.891

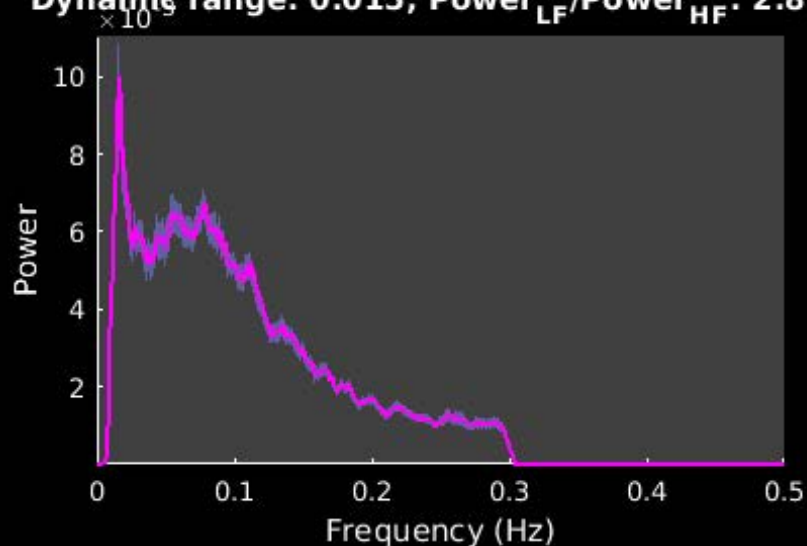

### IVA\_100ICs\_mean\_component\_ica\_s\_all\_6

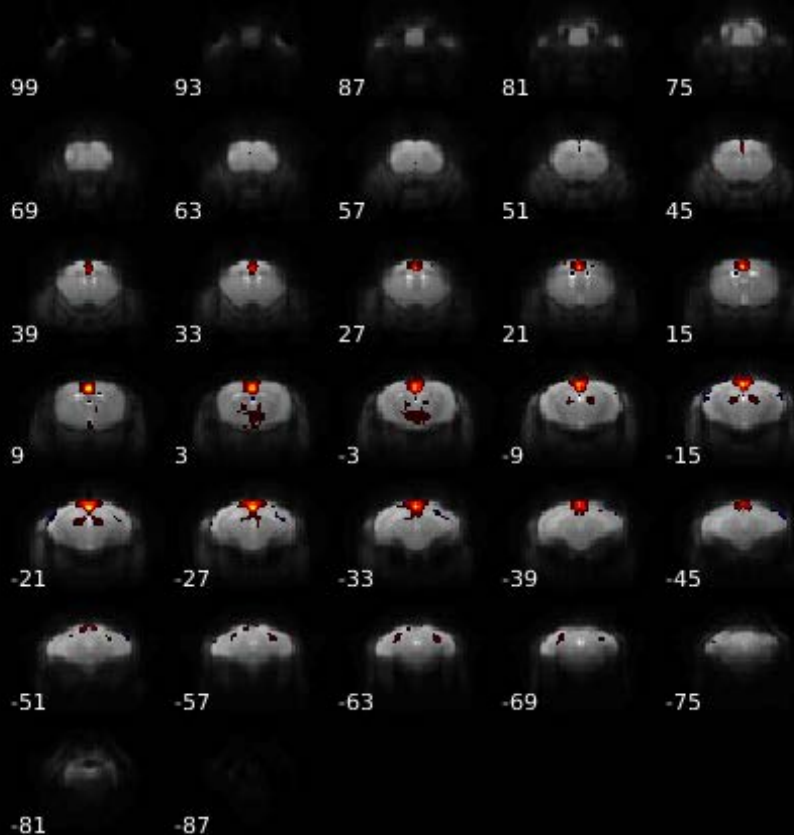

Peak Coordinates (mm)  
(0, 132, -27)

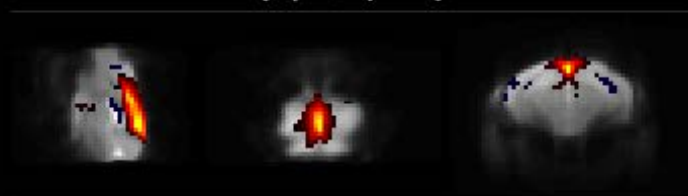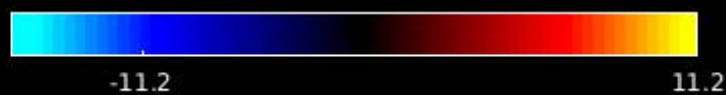

### Component 052

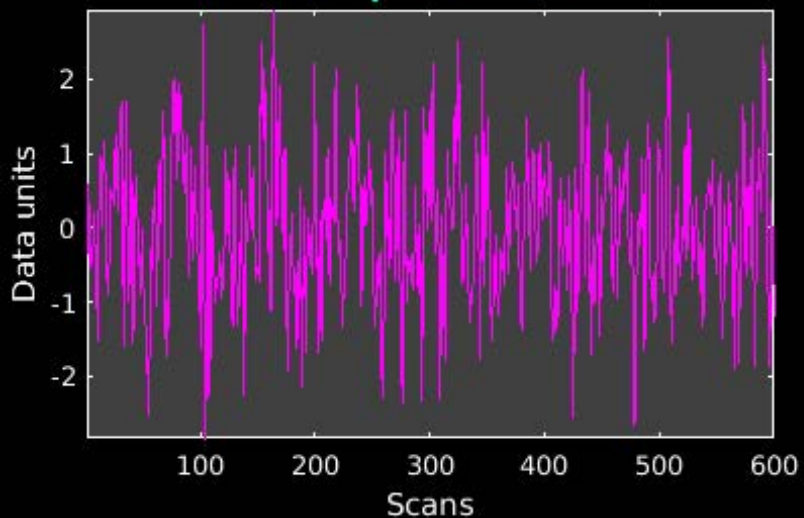

Dynamic range: 0.014,  $\text{Power}_{\text{LF}}/\text{Power}_{\text{HF}}: 1.009$

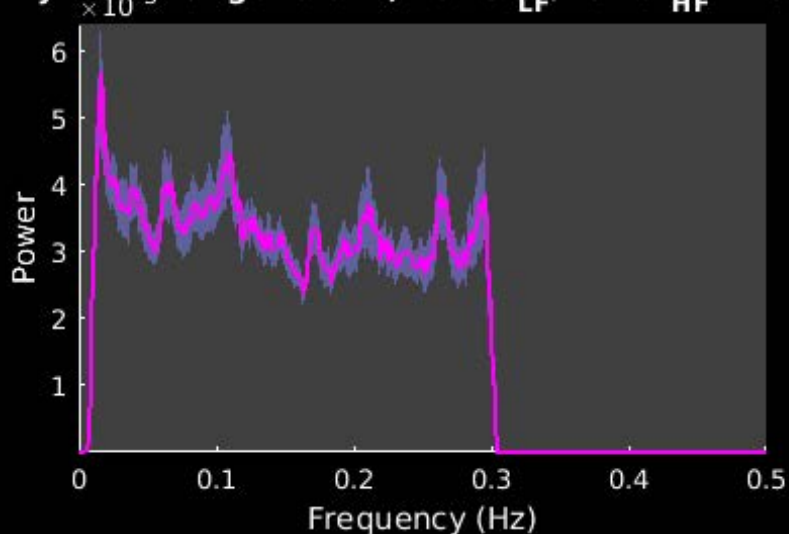

### IVA\_100ICs\_mean\_component\_ica\_s\_all\_52

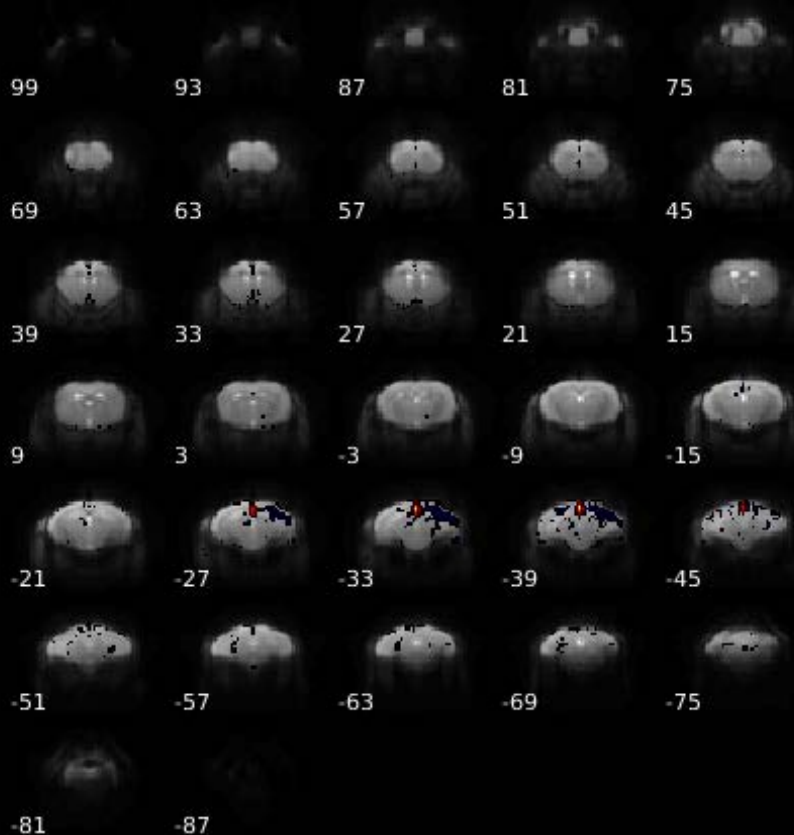

Peak Coordinates (mm)  
(0, 126, -39)

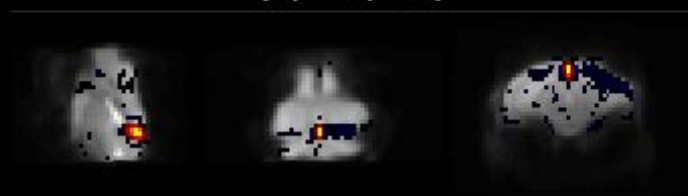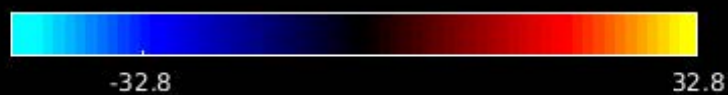

**Component 062**

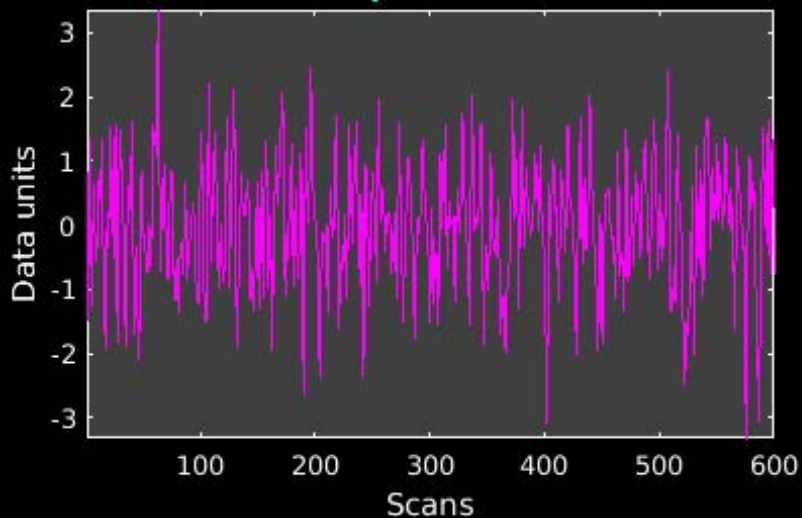

**Dynamic range: 0.012, Power<sub>LF</sub>/Power<sub>HF</sub>: 1.063**

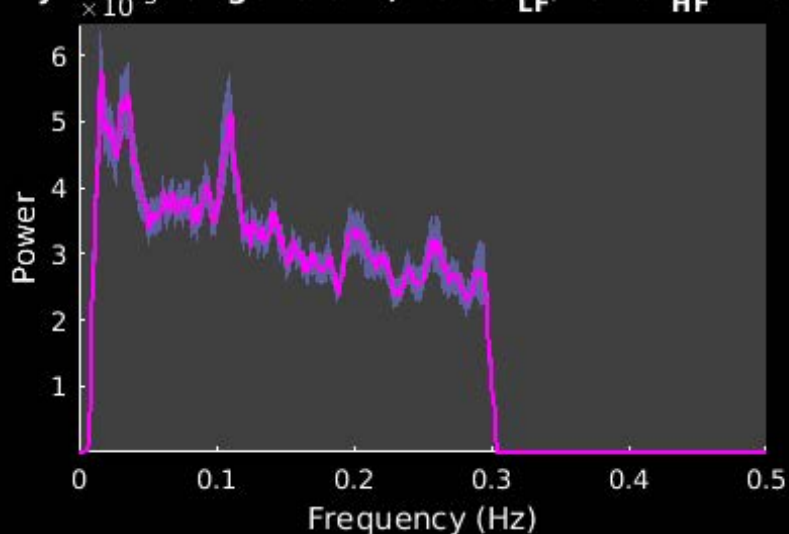

**IVA\_100ICs\_mean\_component\_ica\_s\_all\_62**

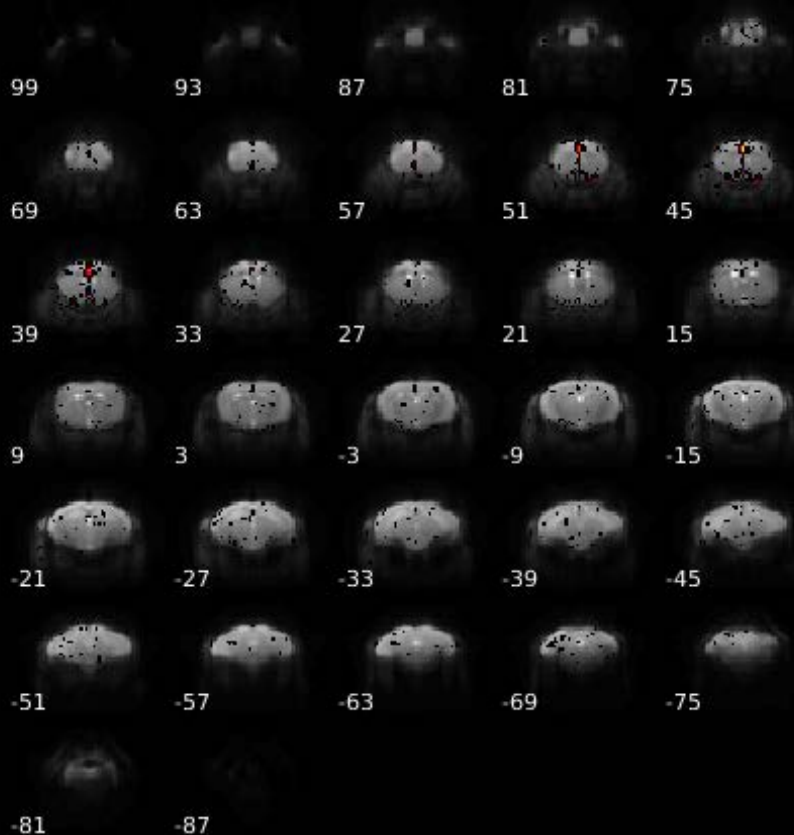

**Peak Coordinates (mm)  
(0,108,45)**

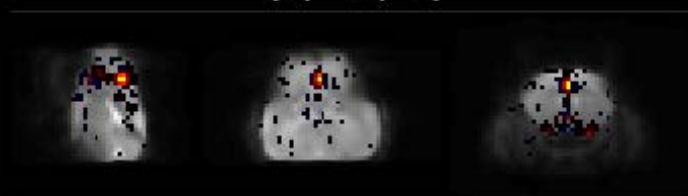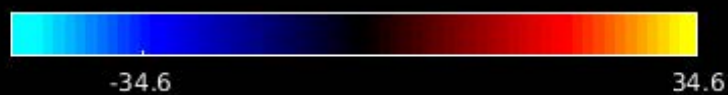

**Component 082**

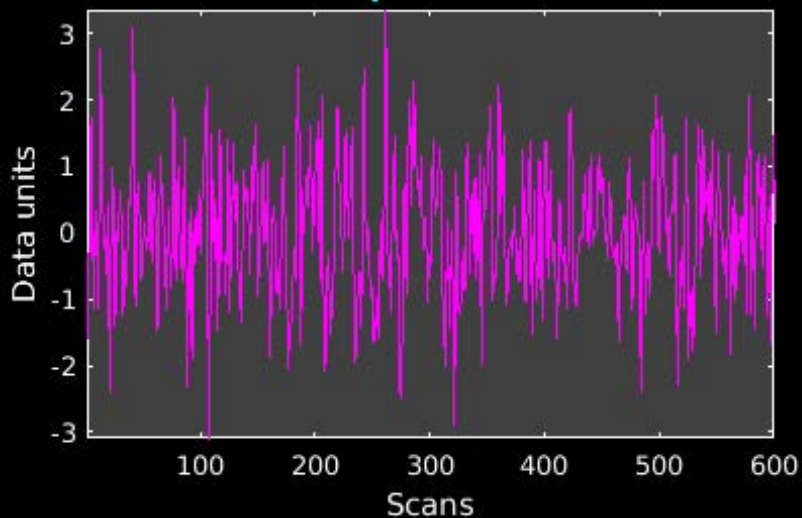

**Dynamic range: 0.014, Power<sub>LF</sub>/Power<sub>HF</sub>: 1.168**

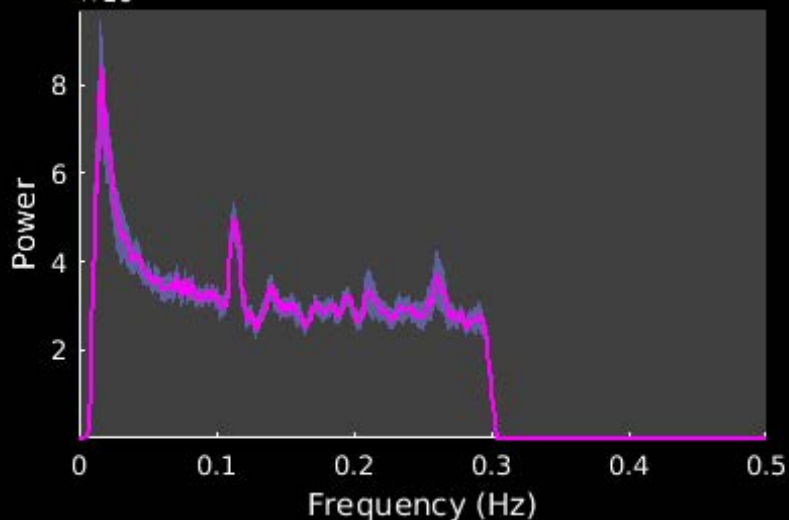

**IVA\_100ICs\_mean\_component\_ica\_s\_all\_82**

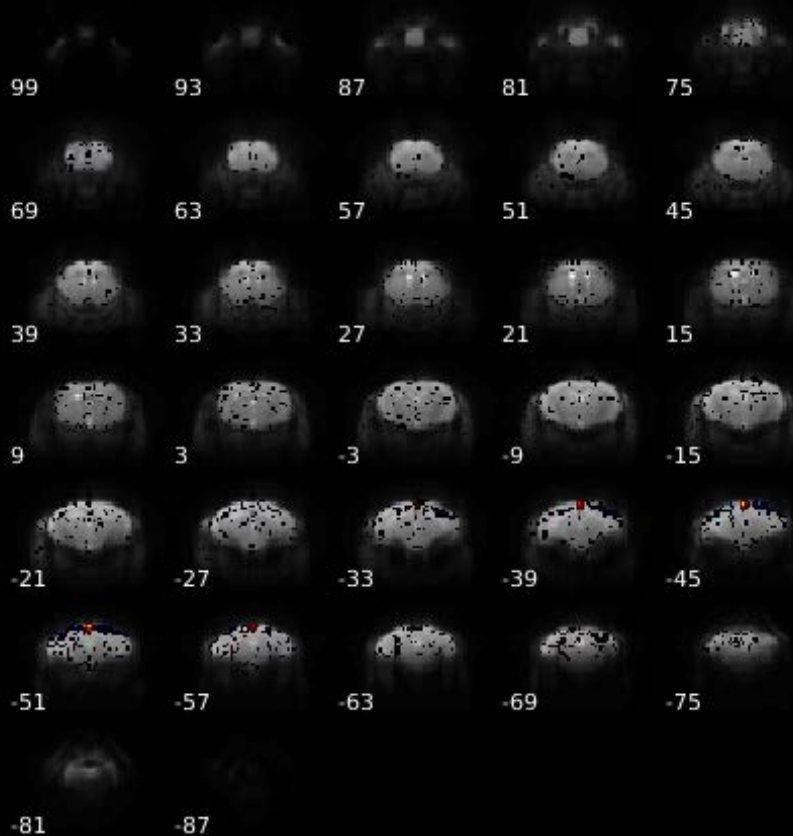

**Peak Coordinates (mm)**  
**(0, 138, -45)**

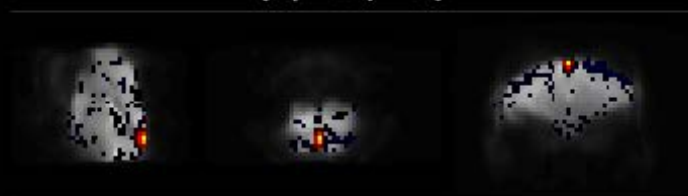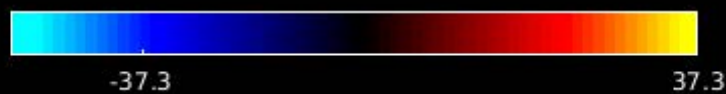

### Component 089

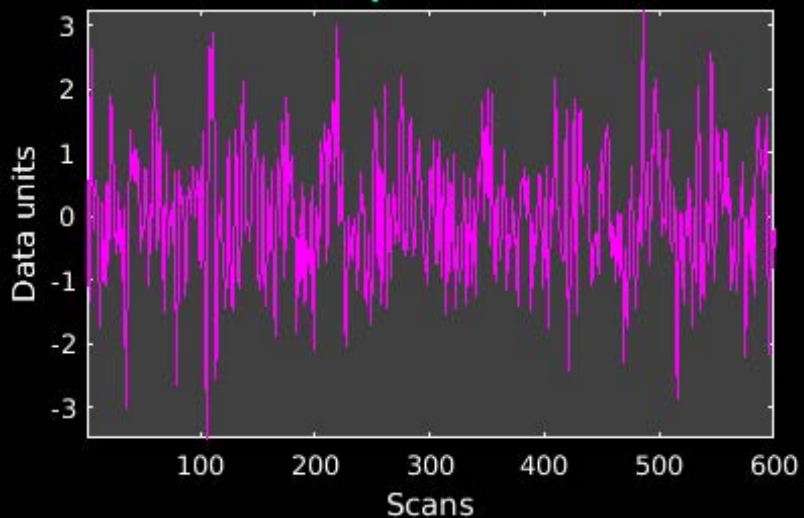

Dynamic range: 0.014,  $\text{Power}_{\text{LF}}/\text{Power}_{\text{HF}}$ : 1.168

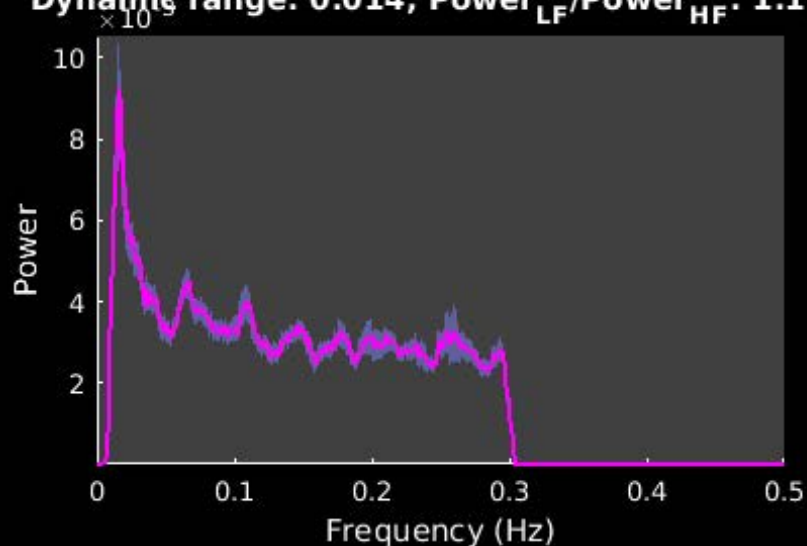

### IVA\_100ICs\_mean\_component\_ica\_s\_all\_89

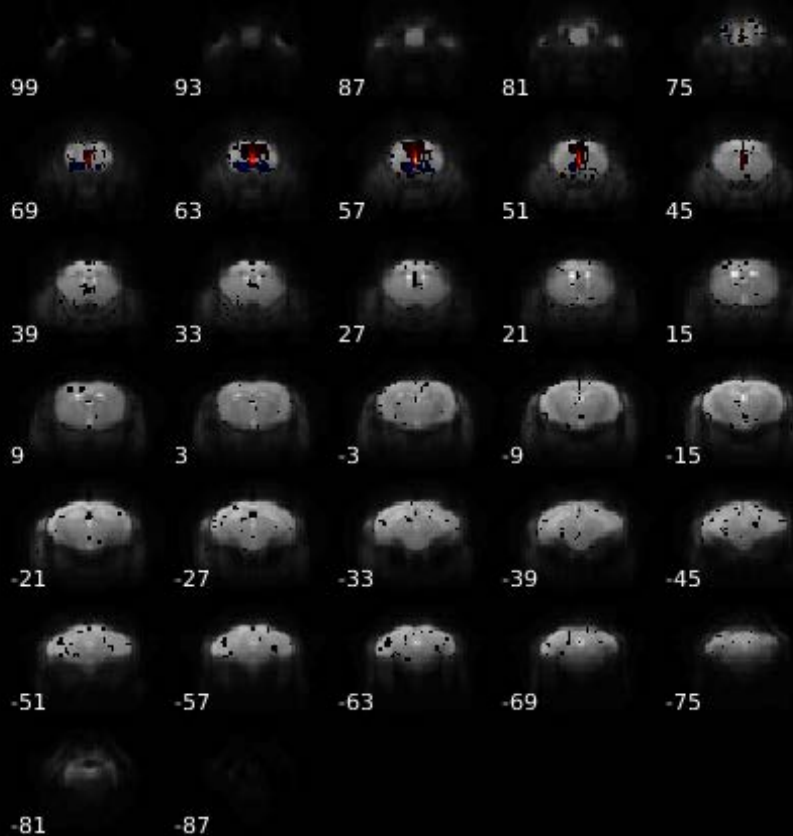

Peak Coordinates (mm)  
(0,78,57)

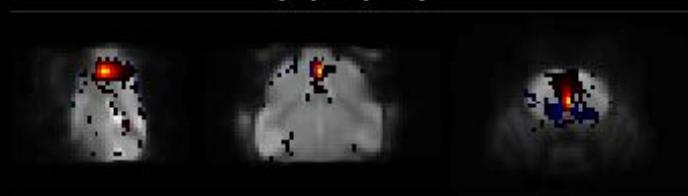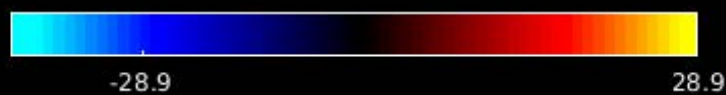

**Component 005**

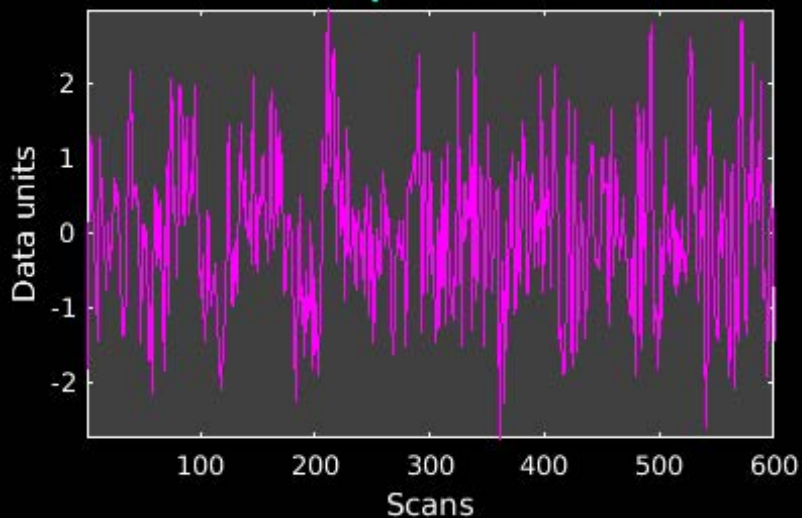

**Dynamic range: 0.022, Power<sub>LF</sub>/Power<sub>HF</sub>: 2.531**

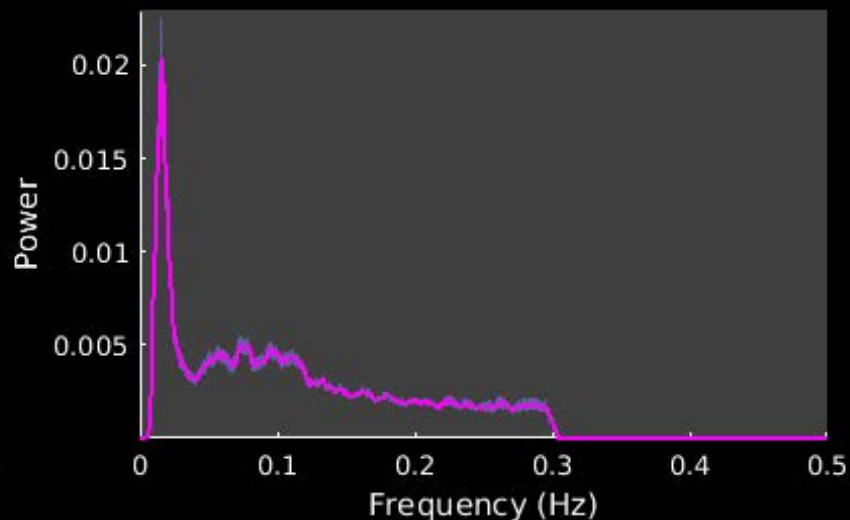

**IVA\_100ICs\_mean\_component\_ica\_s\_all\_5**

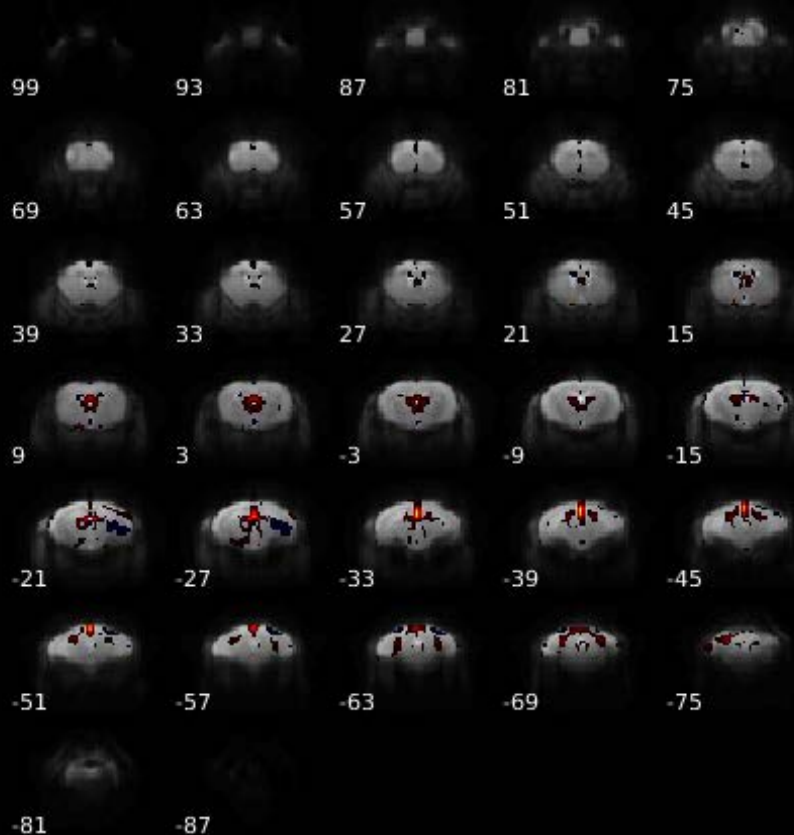

**Peak Coordinates (mm)  
(0,120,-39)**

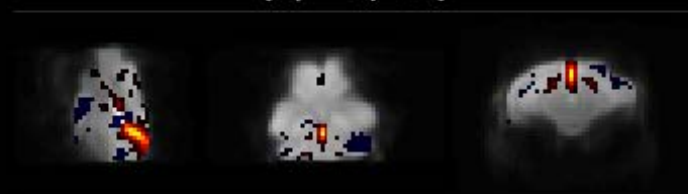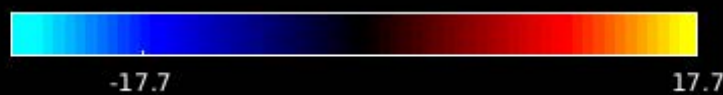

**Component 008**

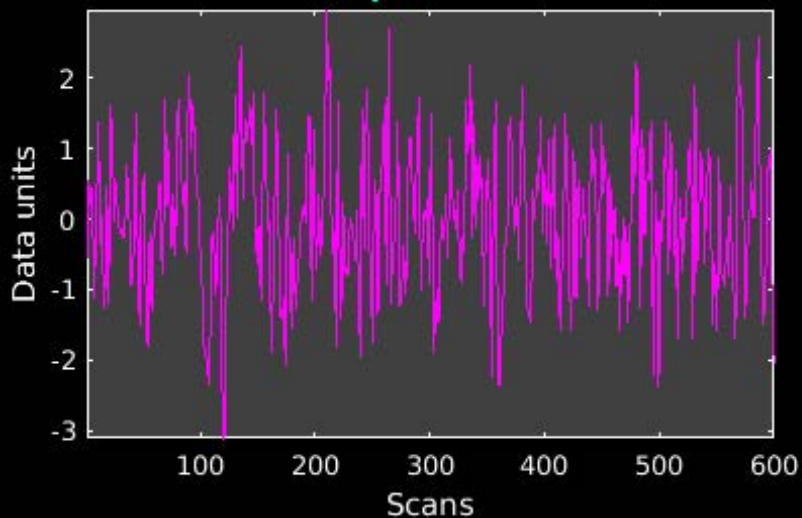

**Dynamic range: 0.015, Power<sub>LF</sub>/Power<sub>HF</sub>: 1.614**

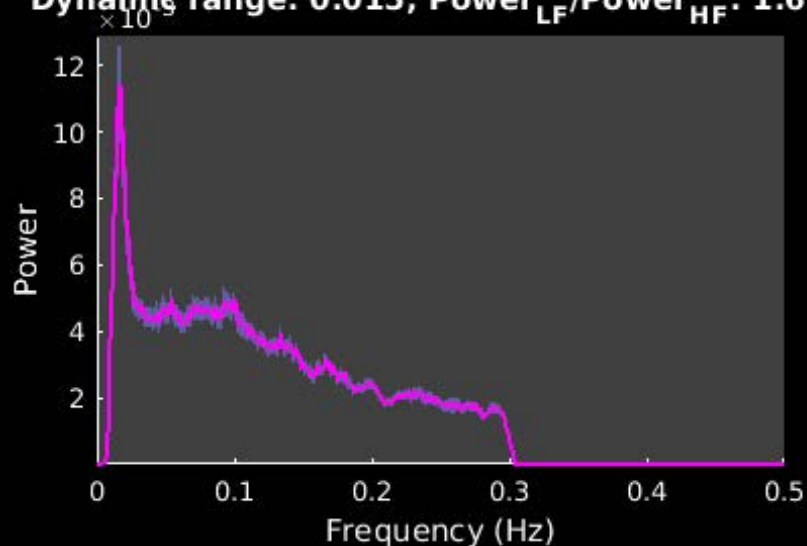

**IVA\_100ICs\_mean\_component\_ica\_s\_all\_8**

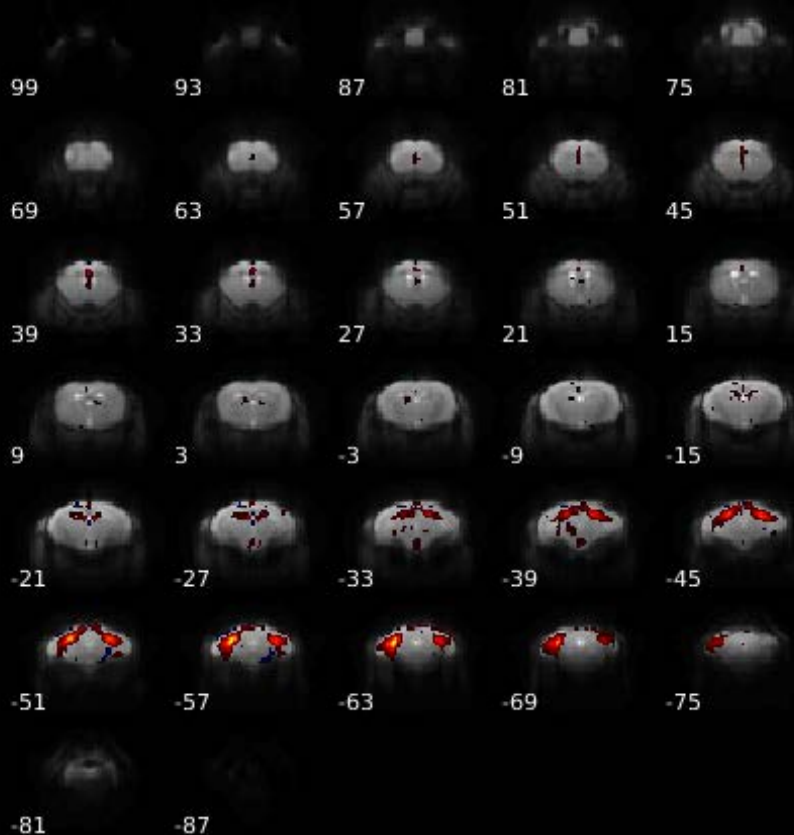

**Peak Coordinates (mm)  
(-54,96,-63)**

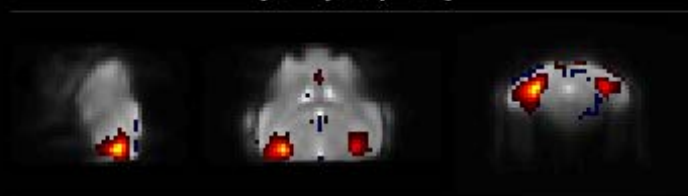



### Component 034

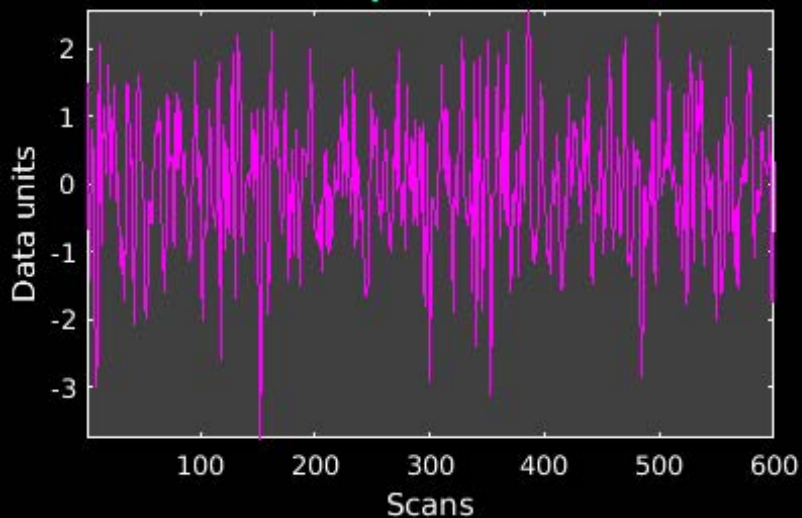

Dynamic range: 0.009,  $\text{Power}_{\text{LF}}/\text{Power}_{\text{HF}}: 0.786$

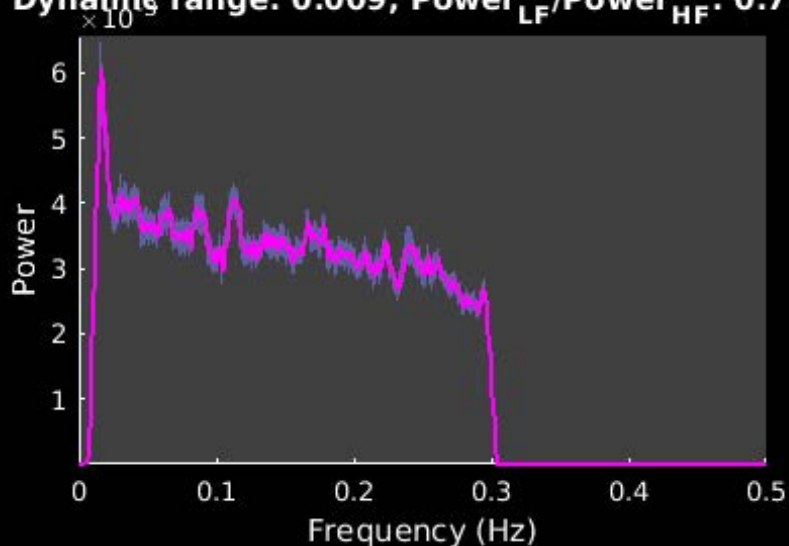

### IVA\_100ICs\_mean\_component\_ica\_s\_all\_34

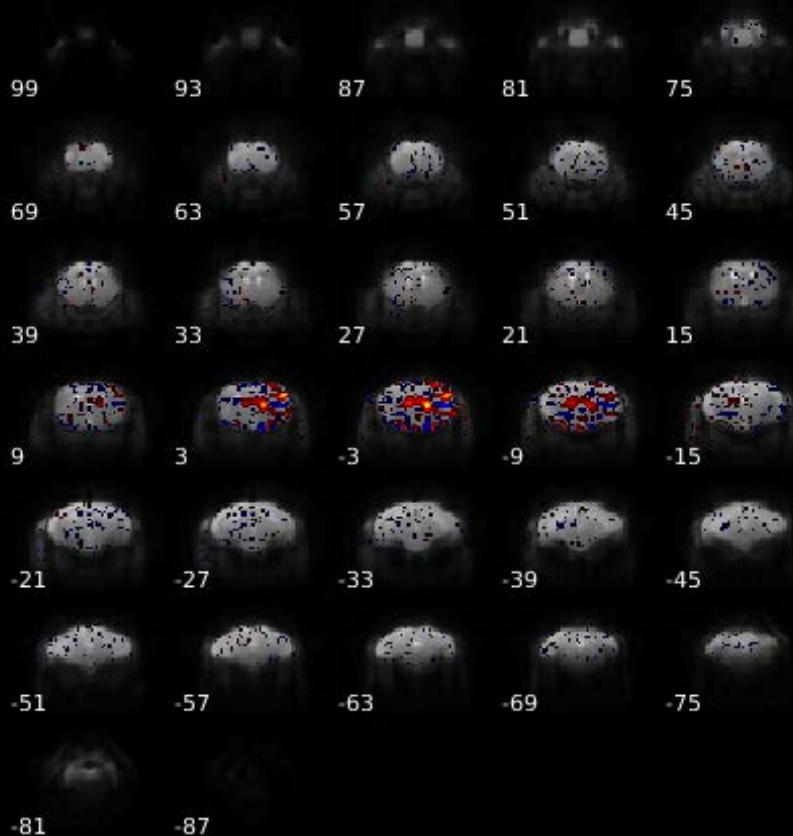

Peak Coordinates (mm)  
(24,84,-3)

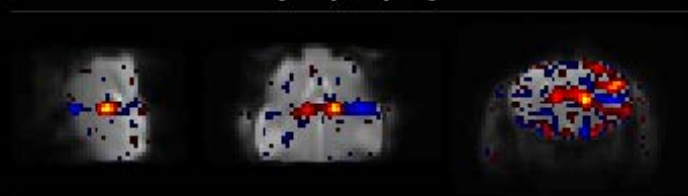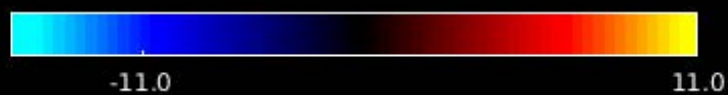

### Component 017

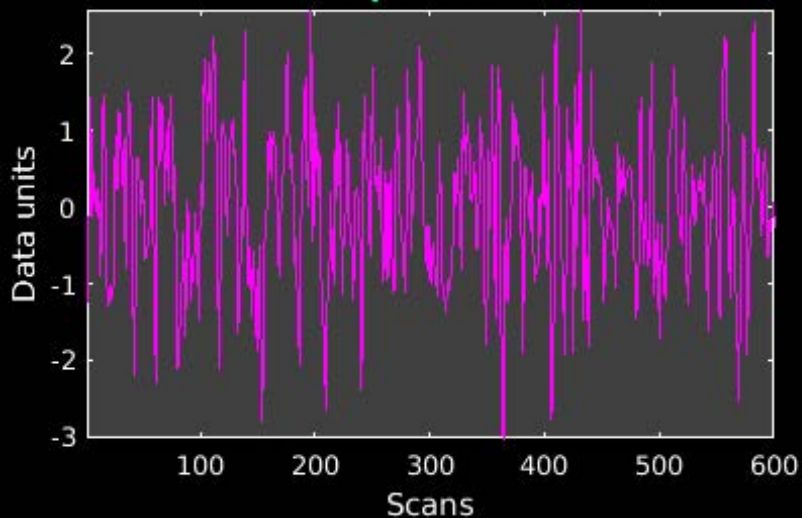

Dynamic range: 0.017,  $\text{Power}_{\text{LF}}/\text{Power}_{\text{HF}}: 2.868$

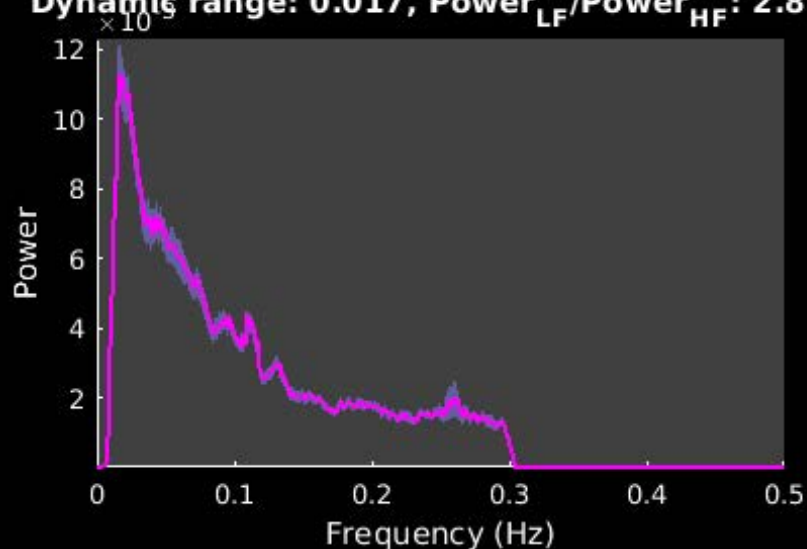

### IVA\_100ICs\_mean\_component\_ica\_s\_all\_17

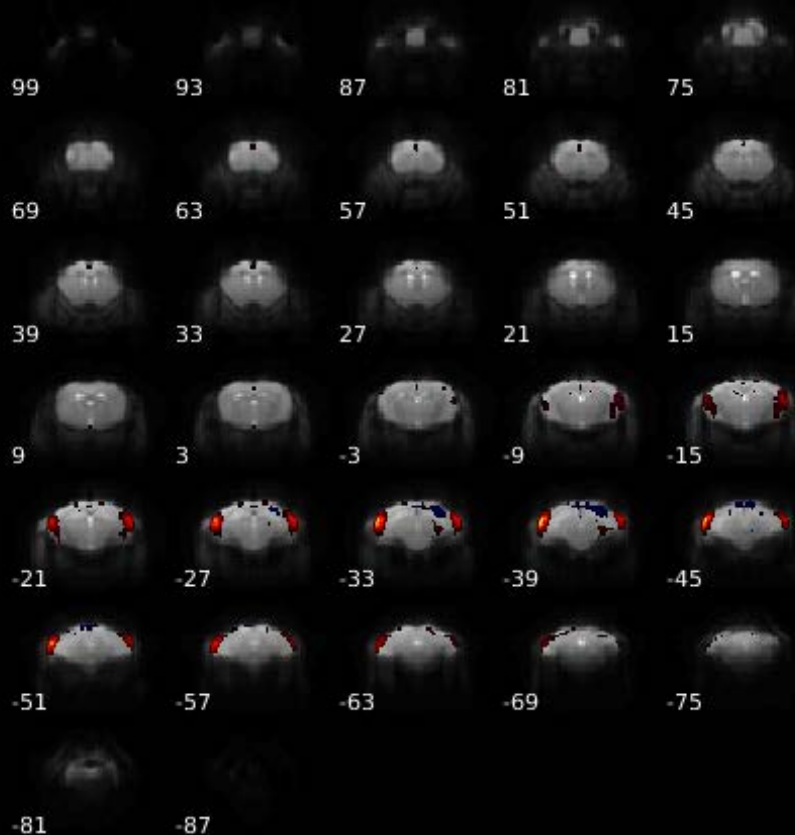

Peak Coordinates (mm)  
(-90,96,-39)

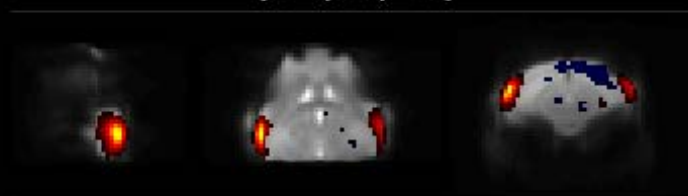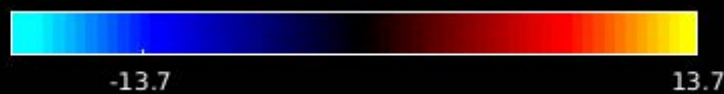

**Component 046**

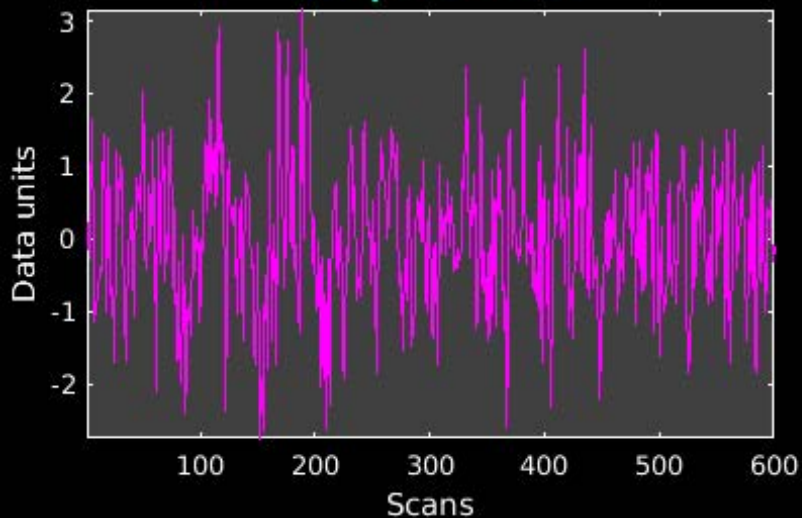

**Dynamic range: 0.014, Power<sub>LF</sub>/Power<sub>HF</sub>: 1.686**

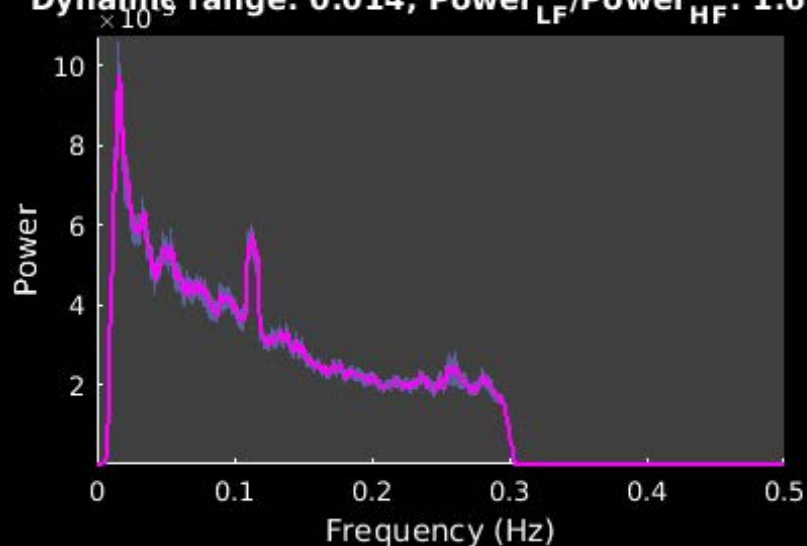

**IVA\_100ICs\_mean\_component\_ica\_s\_all\_46**

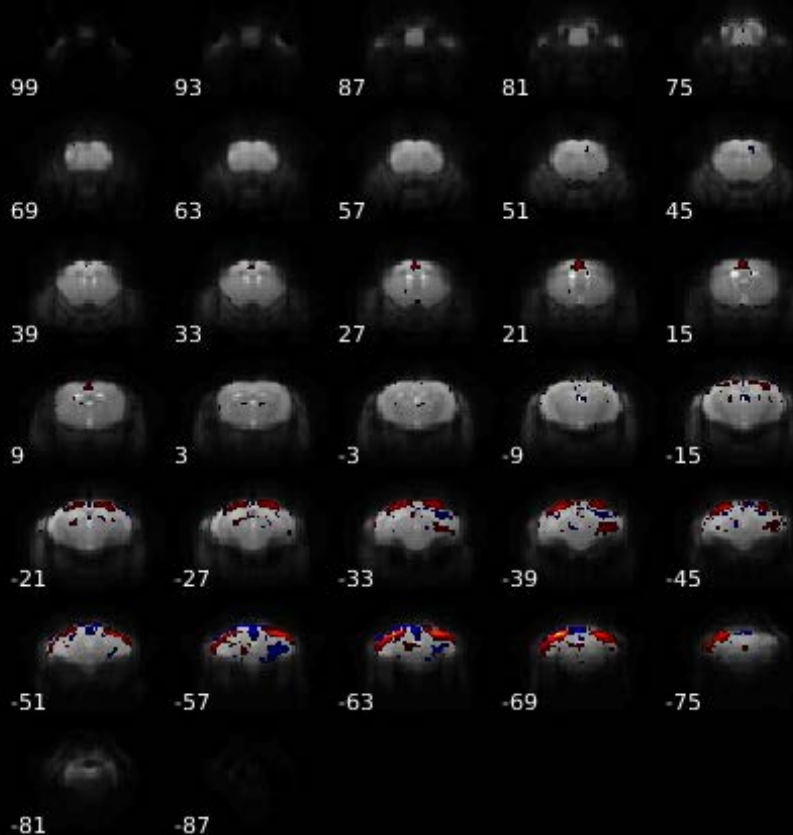

**Peak Coordinates (mm)  
(-48,120,-69)**

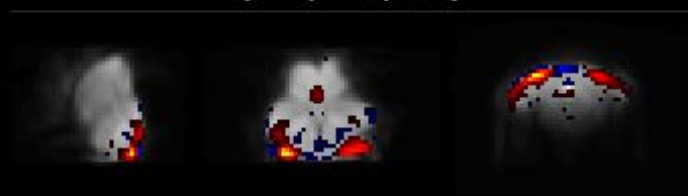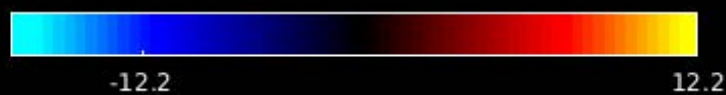

**Component 004**

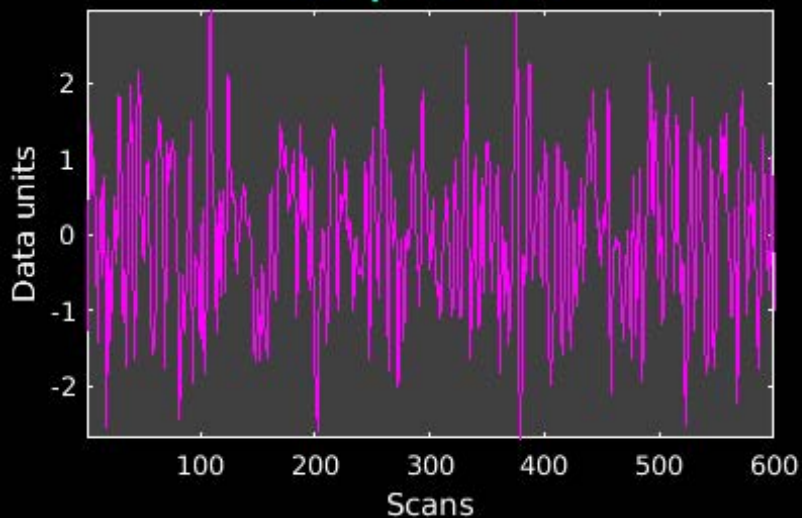

**Dynamic range: 0.016, Power<sub>LF</sub>/Power<sub>HF</sub>: 3.119**

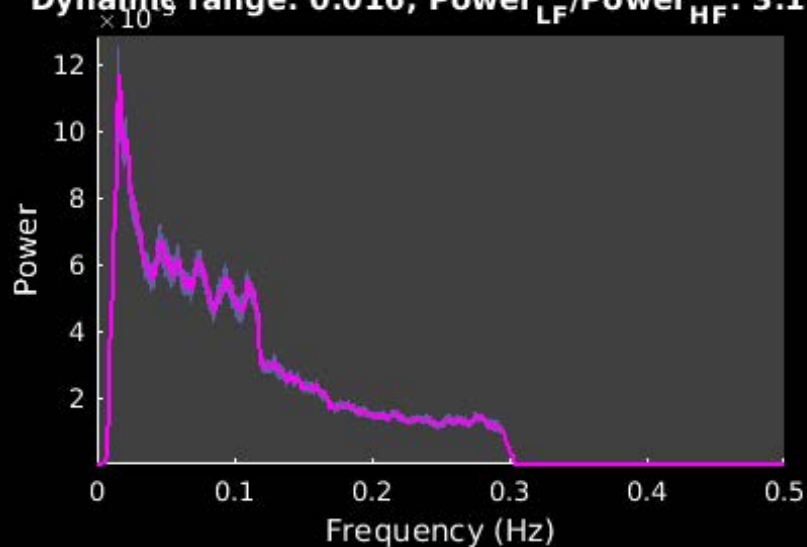

**IVA\_100ICs\_mean\_component\_ica\_s\_all\_4**

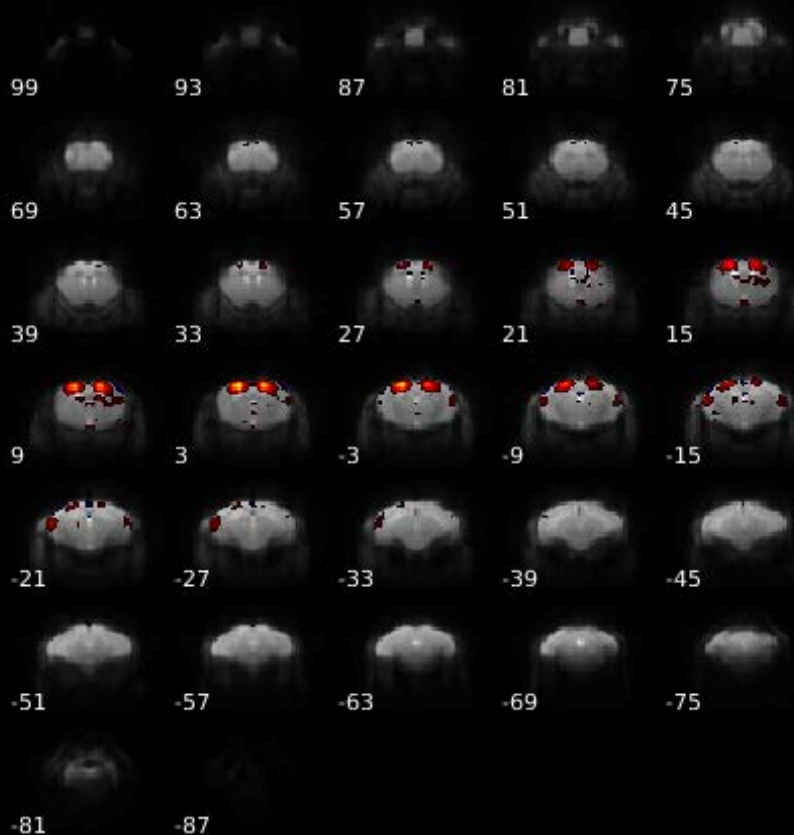

**Peak Coordinates (mm)**  
**(-36,126,3)**

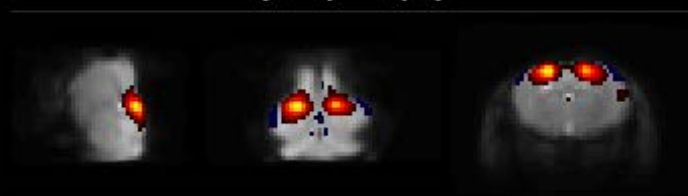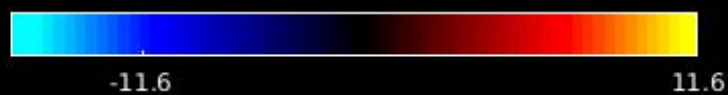

### Component 011

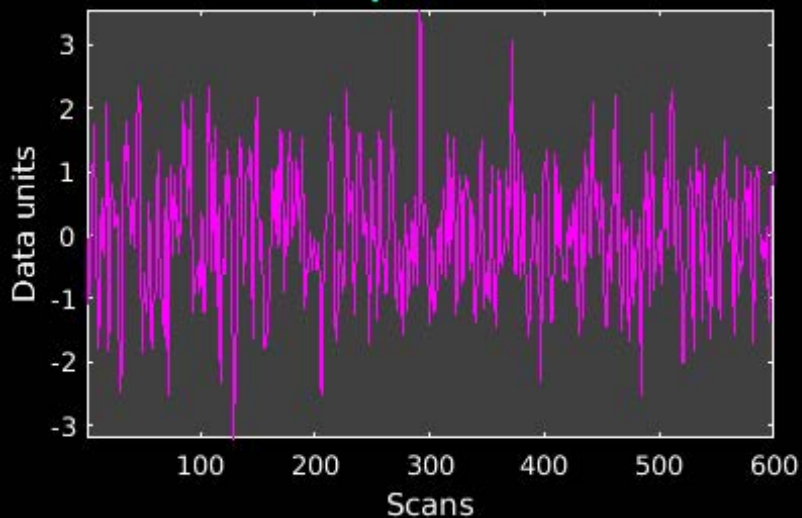

Dynamic range: 0.012,  $\text{Power}_{\text{LF}}/\text{Power}_{\text{HF}}$ : 1.645

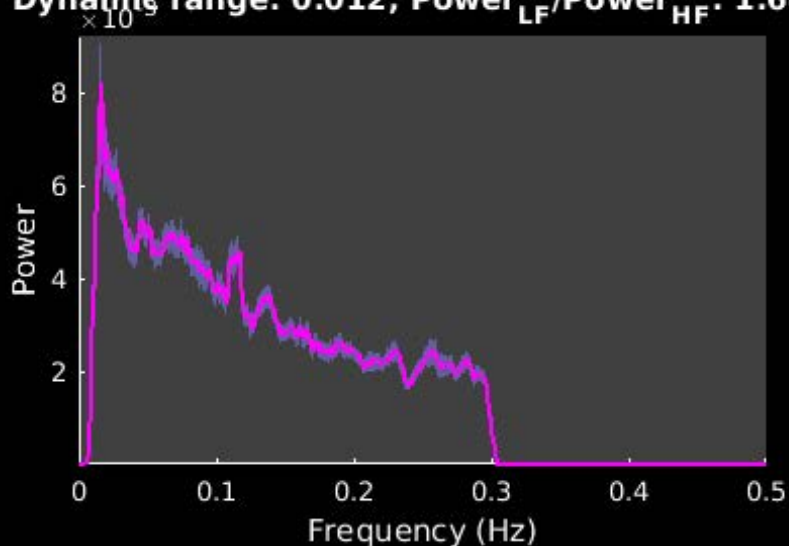

### IVA\_100ICs\_mean\_component\_ica\_s\_all\_11

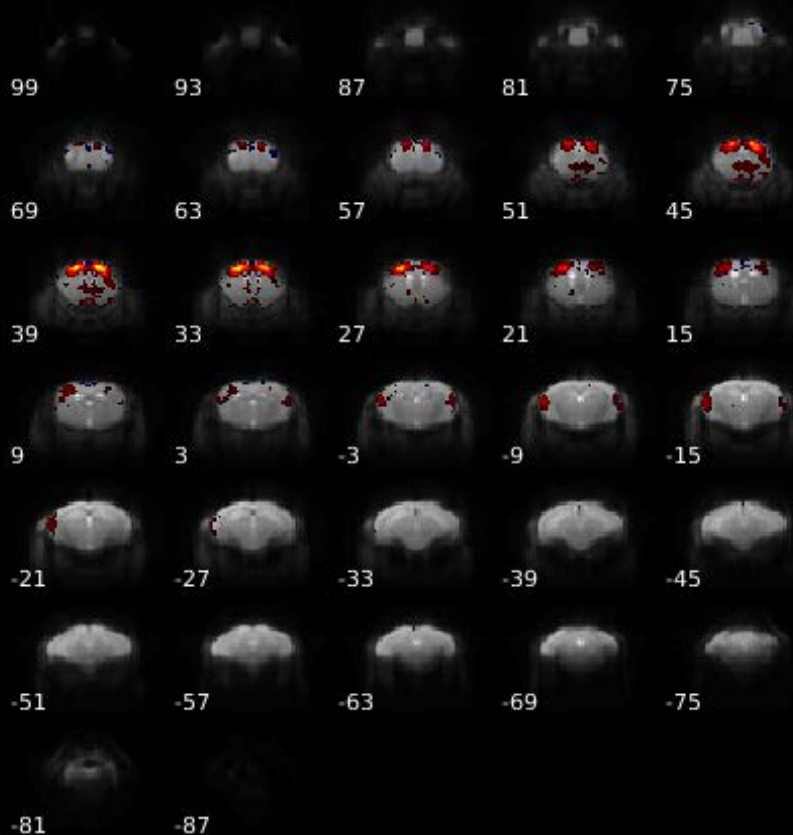

Peak Coordinates (mm)  
(-36,114,33)

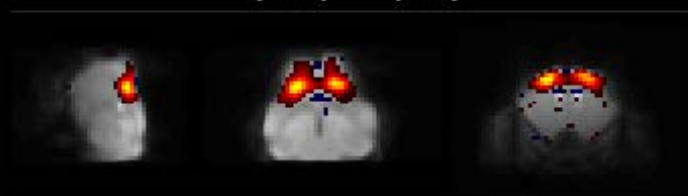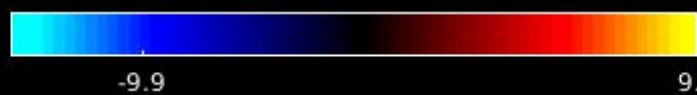

### Component 031

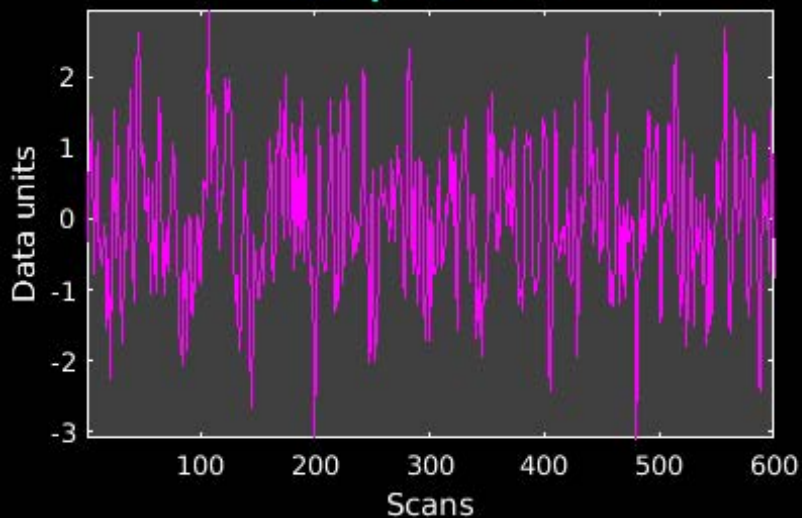

Dynamic range: 0.014,  $\text{Power}_{\text{LF}}/\text{Power}_{\text{HF}}$ : 1.969

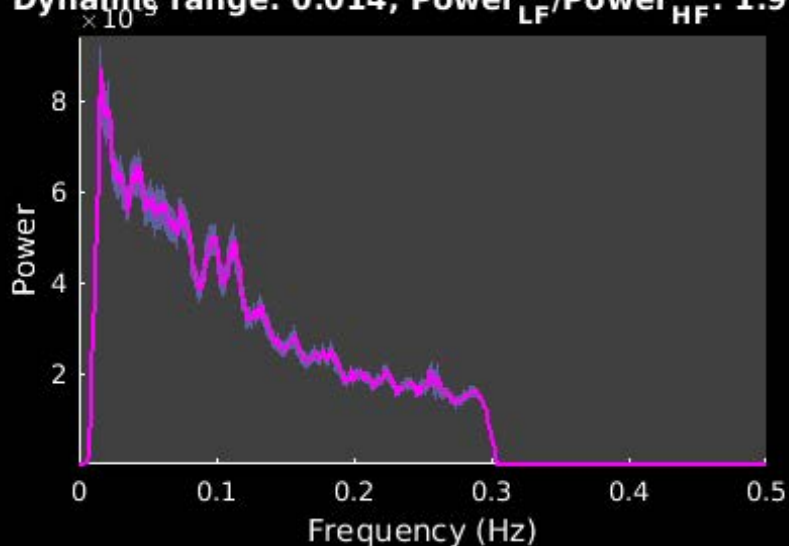

### IVA\_100ICs\_mean\_component\_ica\_s\_all\_31

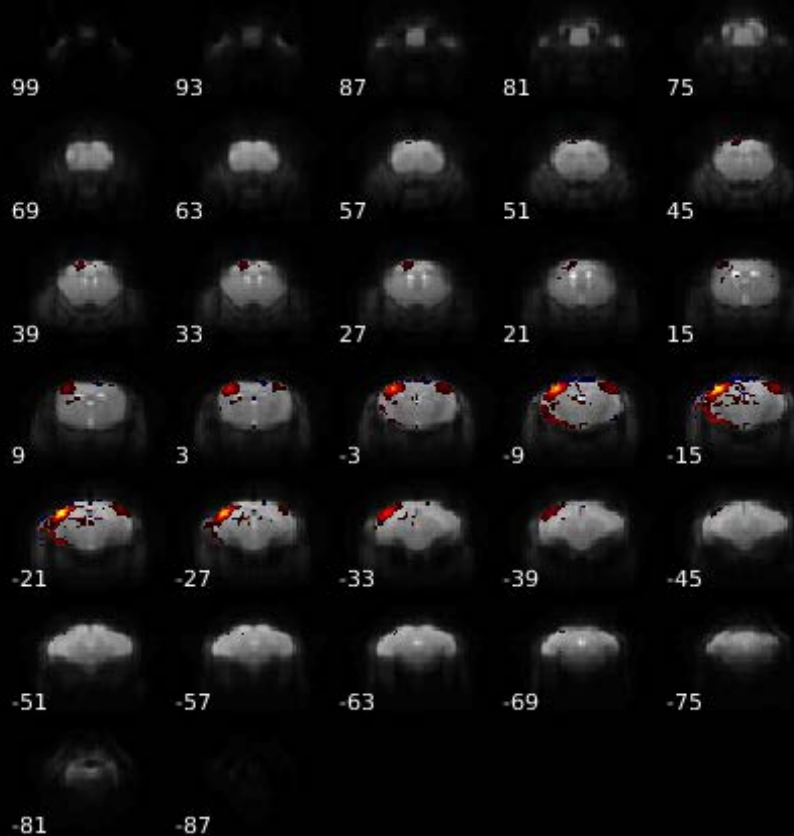

Peak Coordinates (mm)  
(-72,114,-21)

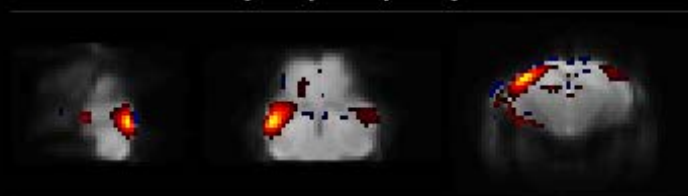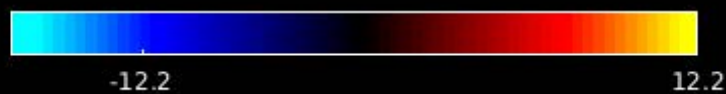

### Component 010

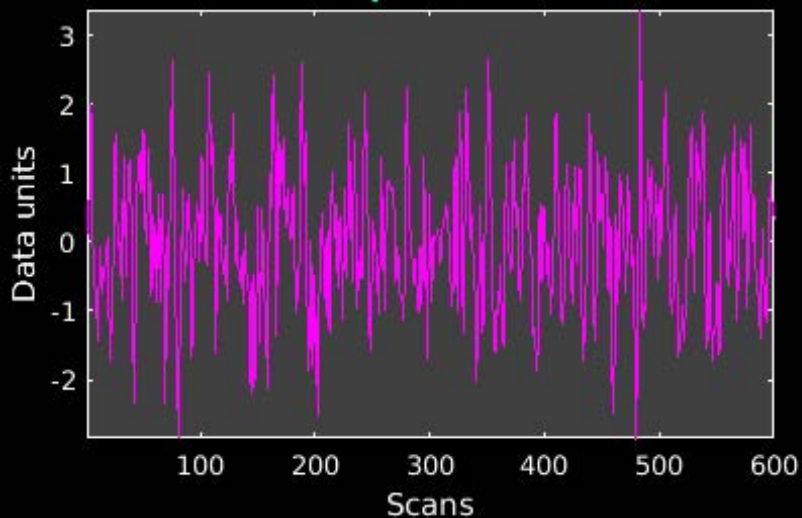

Dynamic range: 0.012,  $\text{Power}_{\text{LF}}/\text{Power}_{\text{HF}}$ : 1.649

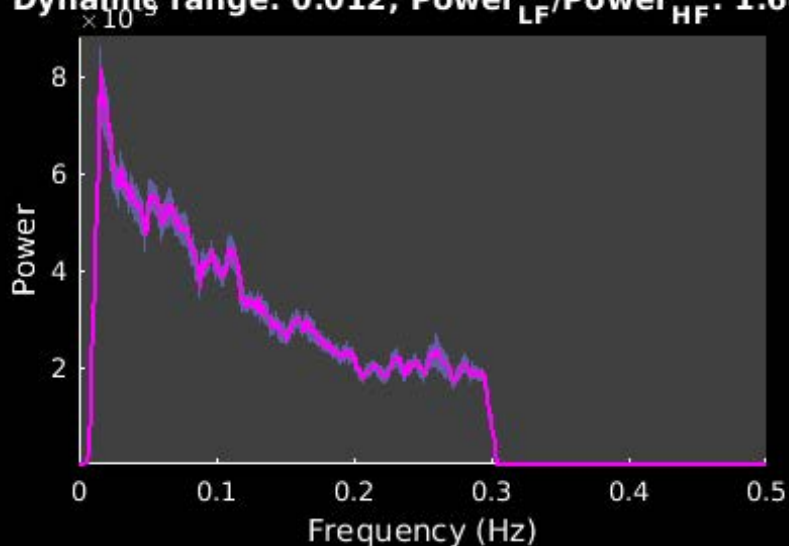

### IVA\_100ICs\_mean\_component\_ica\_s\_all\_10

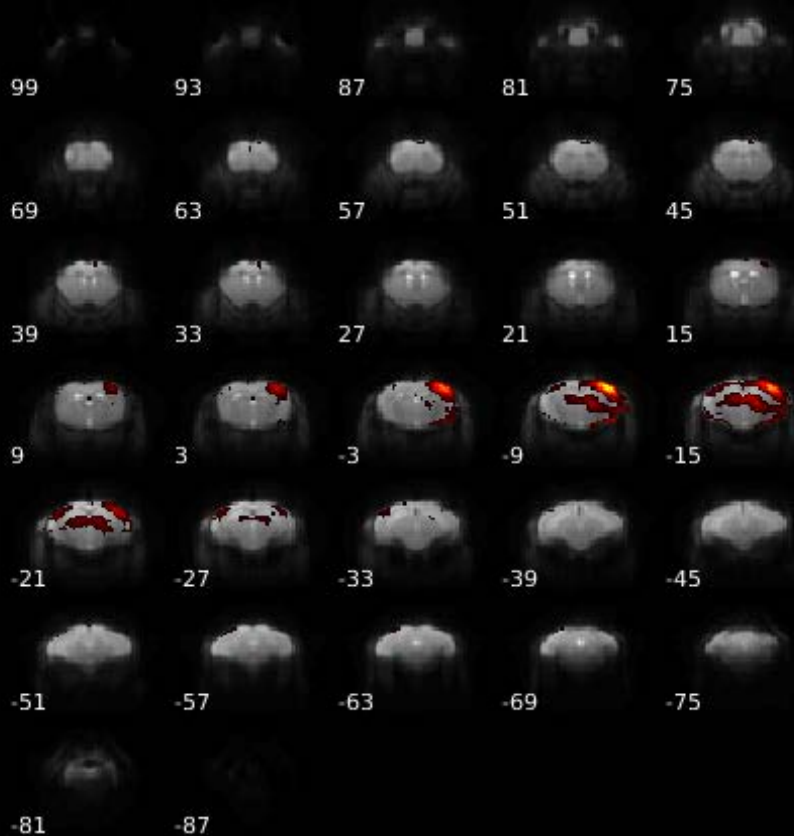

Peak Coordinates (mm)  
(60,126,-9)

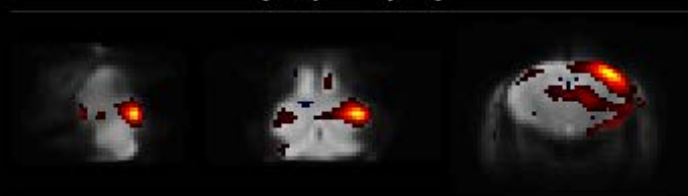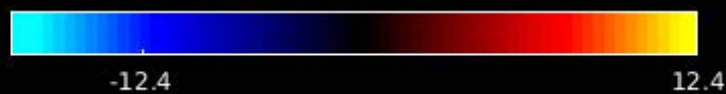

### Component 030

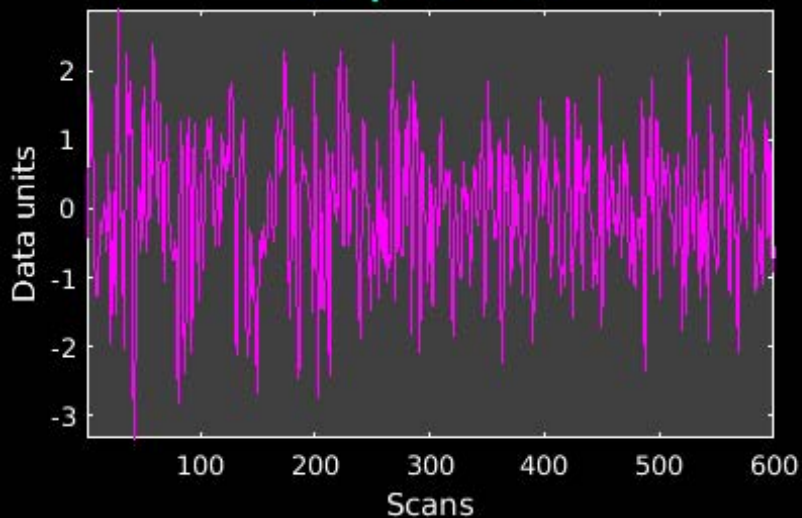

Dynamic range: 0.012,  $\text{Power}_{\text{LF}}/\text{Power}_{\text{HF}}$ : 1.142

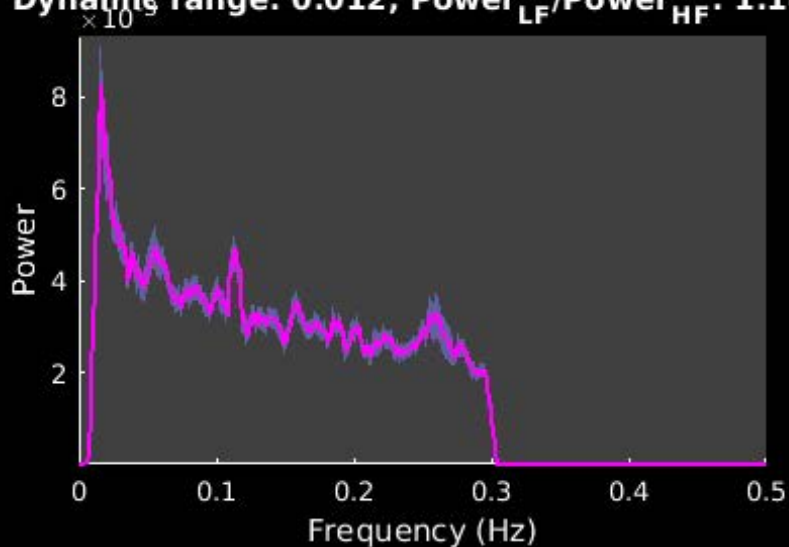

### IVA\_100ICs\_mean\_component\_ica\_s\_all\_30

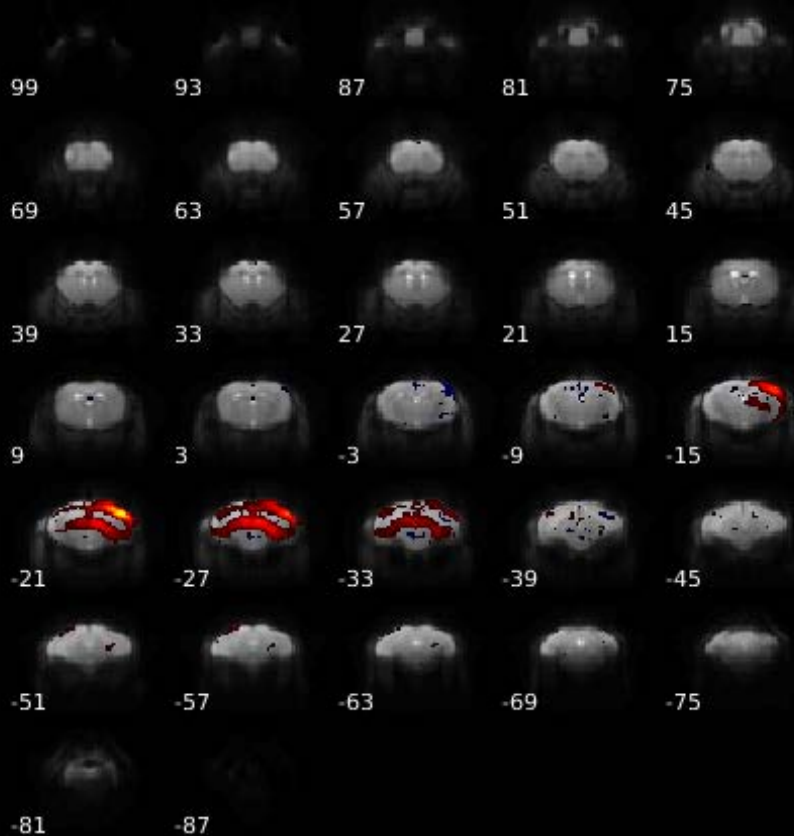

Peak Coordinates (mm)  
(78,114,-21)

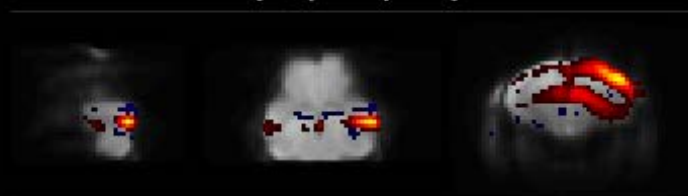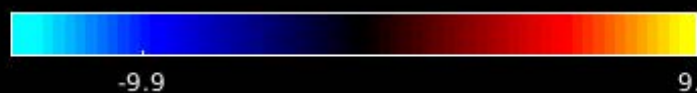



### Component 007

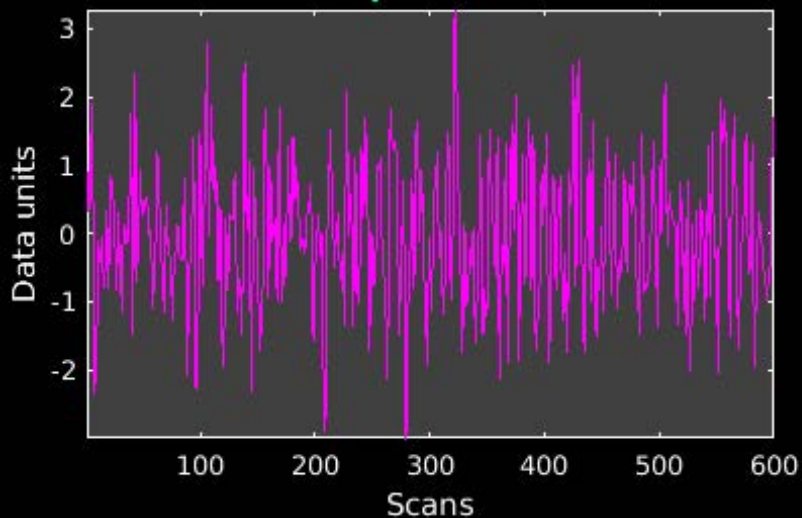

Dynamic range: 0.012,  $\text{Power}_{\text{LF}}/\text{Power}_{\text{HF}}$ : 1.345

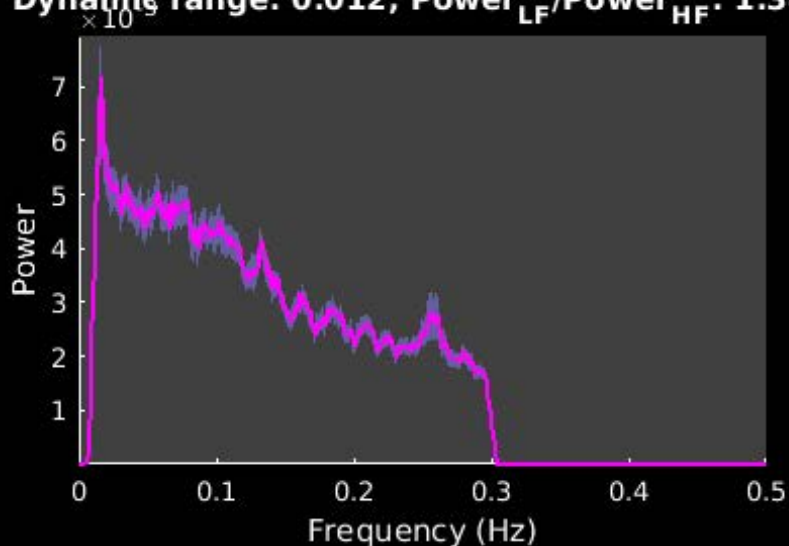

### IVA\_100ICs\_mean\_component\_ica\_s\_all\_7

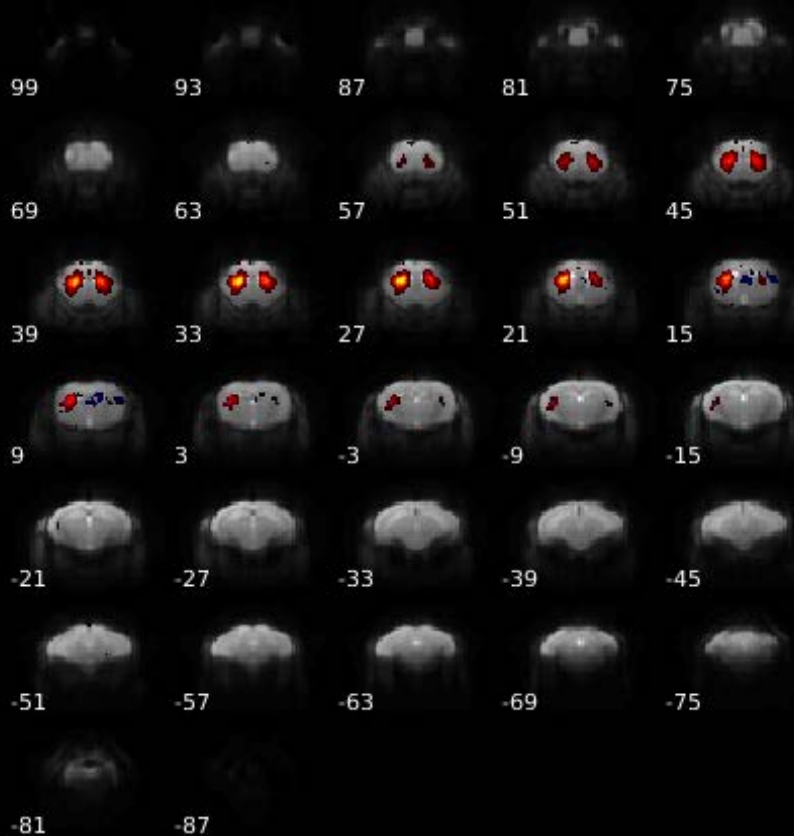

Peak Coordinates (mm)  
(-30,84,33)

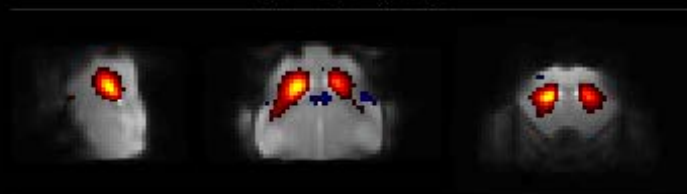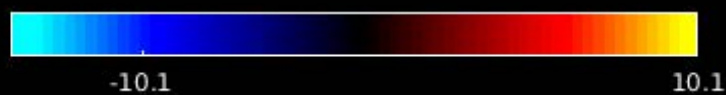

**Component 014**

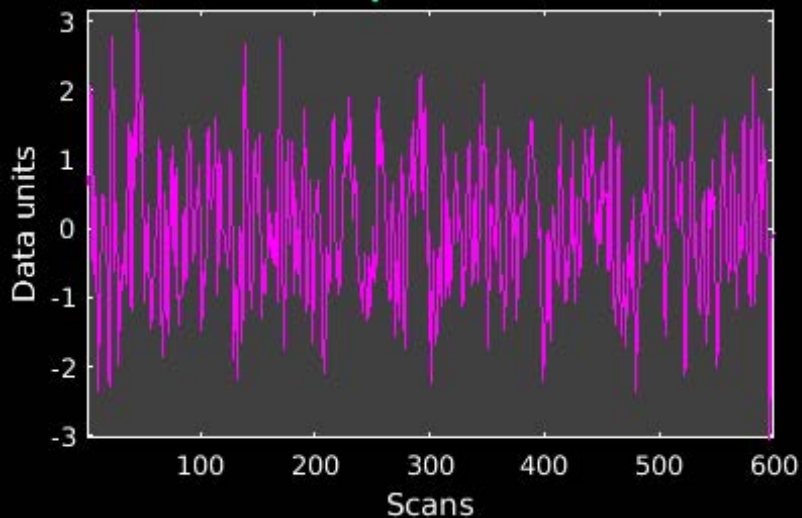

**Dynamic range: 0.013, Power<sub>LF</sub>/Power<sub>HF</sub>: 1.900**

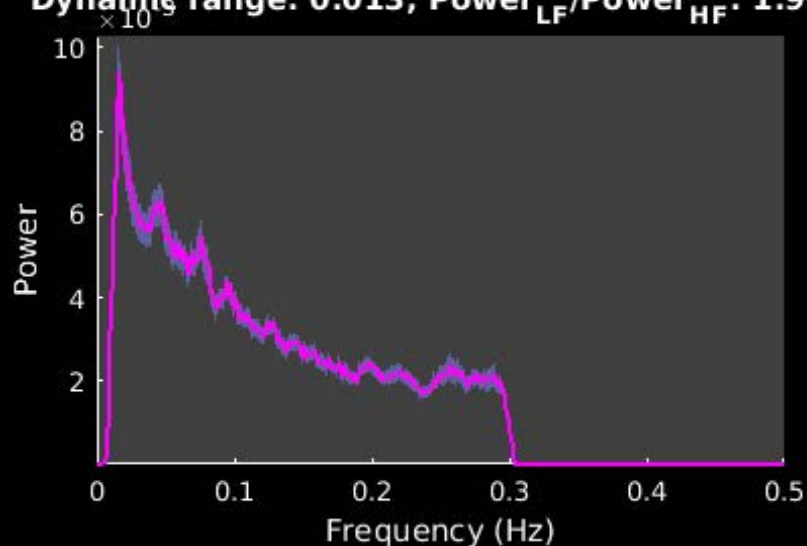

**IVA\_100ICs\_mean\_component\_ica\_s\_all\_14**

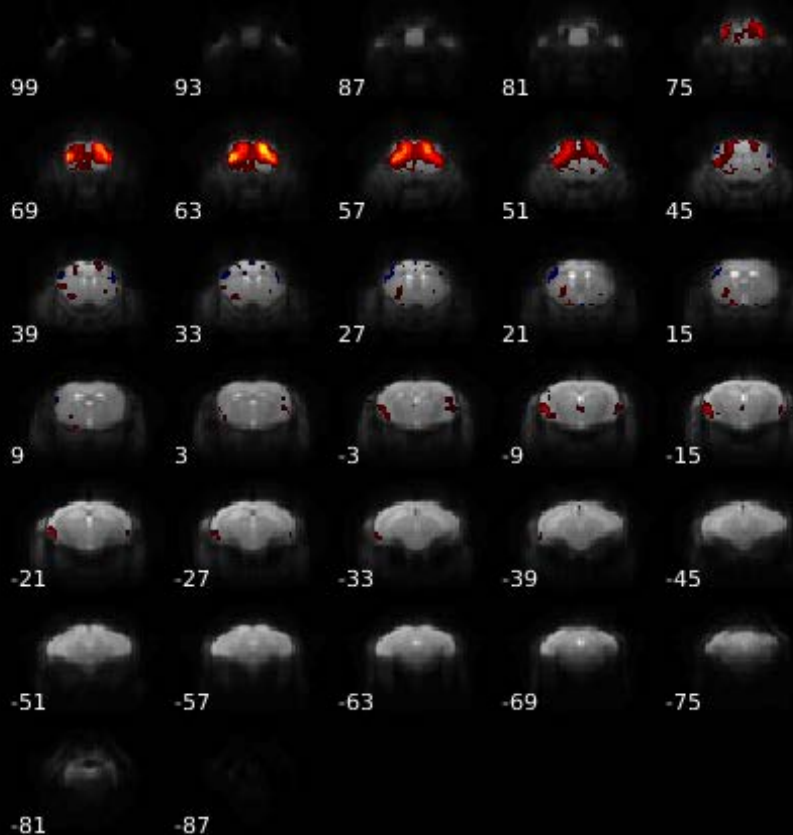

**Peak Coordinates (mm)  
(24,102,63)**

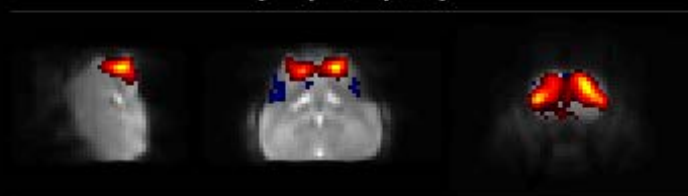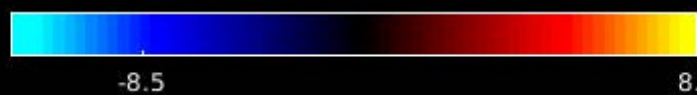

**Component 013**

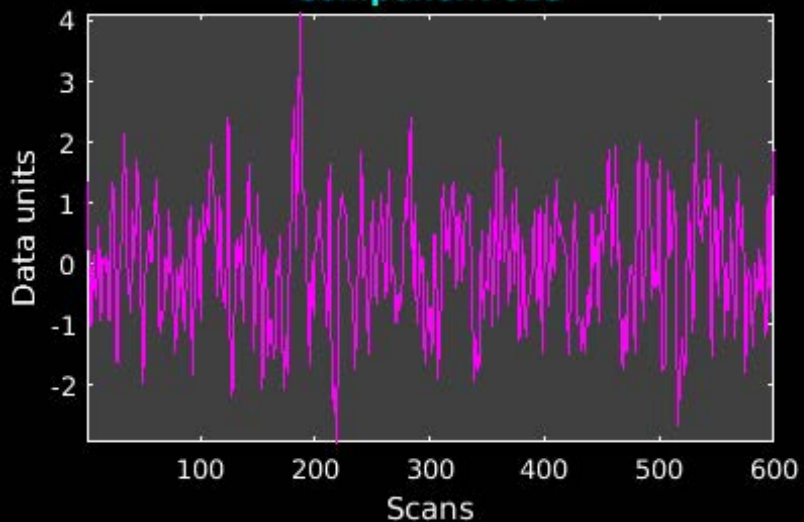

**Dynamic range: 0.014, Power<sub>LF</sub>/Power<sub>HF</sub>: 2.183**

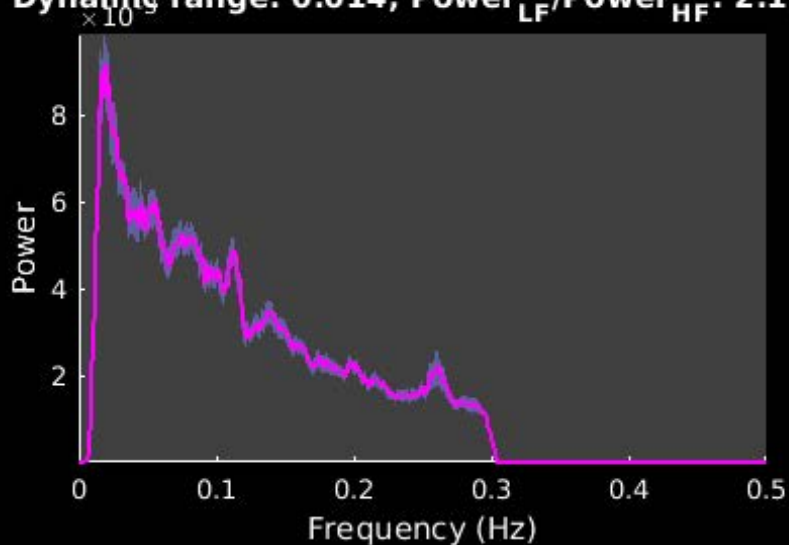

**IVA\_100ICs\_mean\_component\_ica\_s\_all\_13**

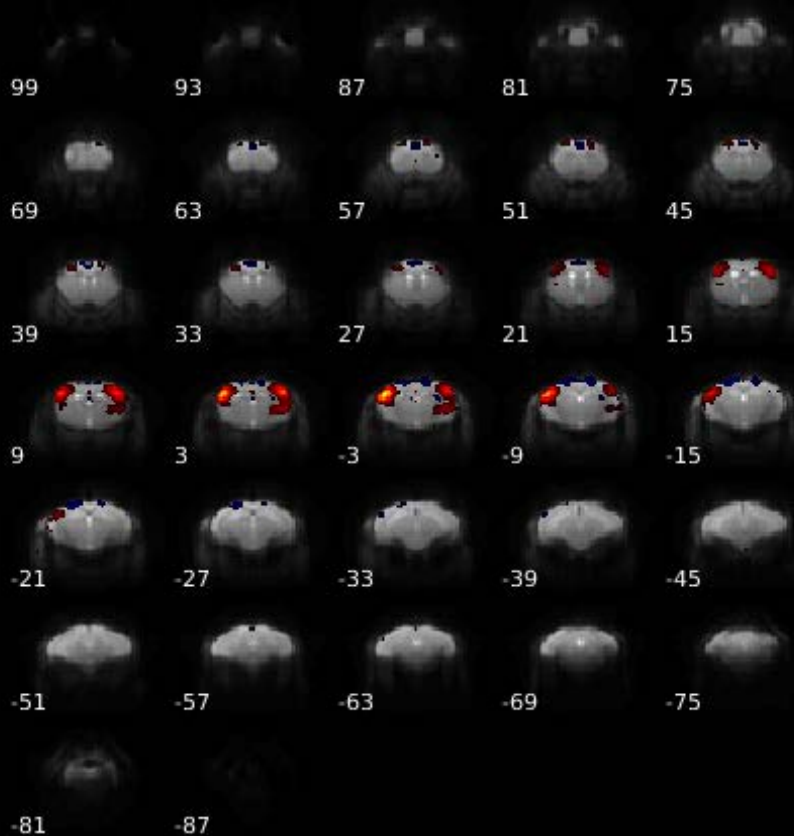

**Peak Coordinates (mm)  
(-78,102,-3)**

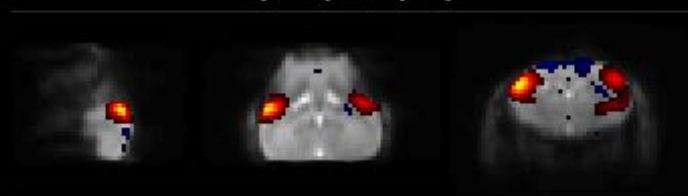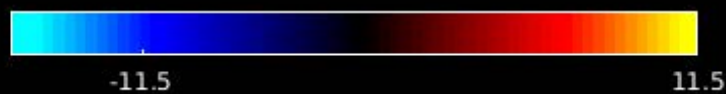

### Component 037

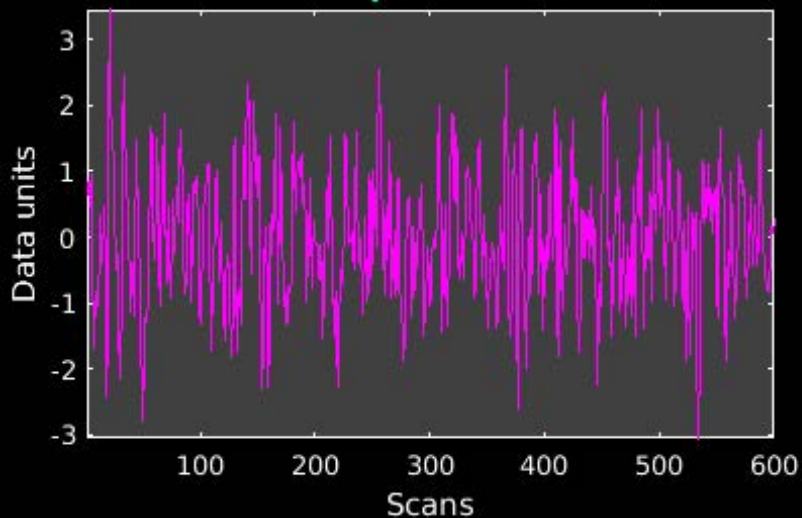

Dynamic range: 0.012, Power<sub>LF</sub>/Power<sub>HF</sub>: 1.510

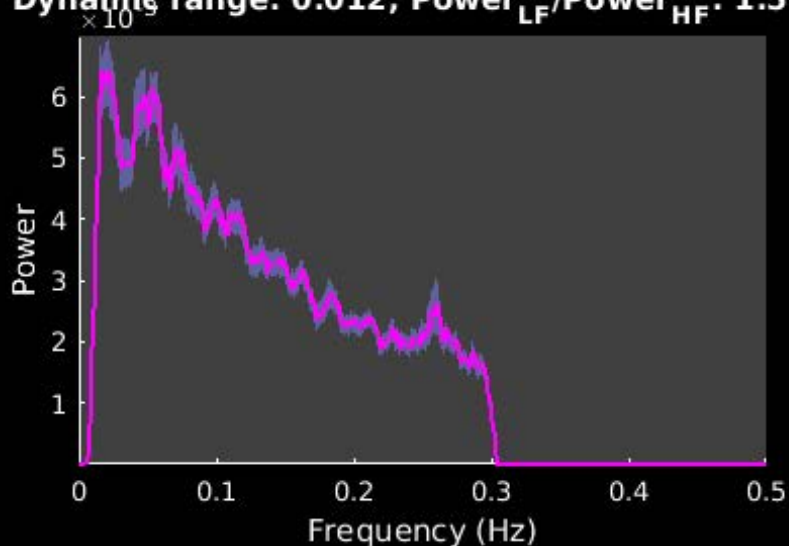

### IVA\_100ICs\_mean\_component\_ica\_s\_all\_37

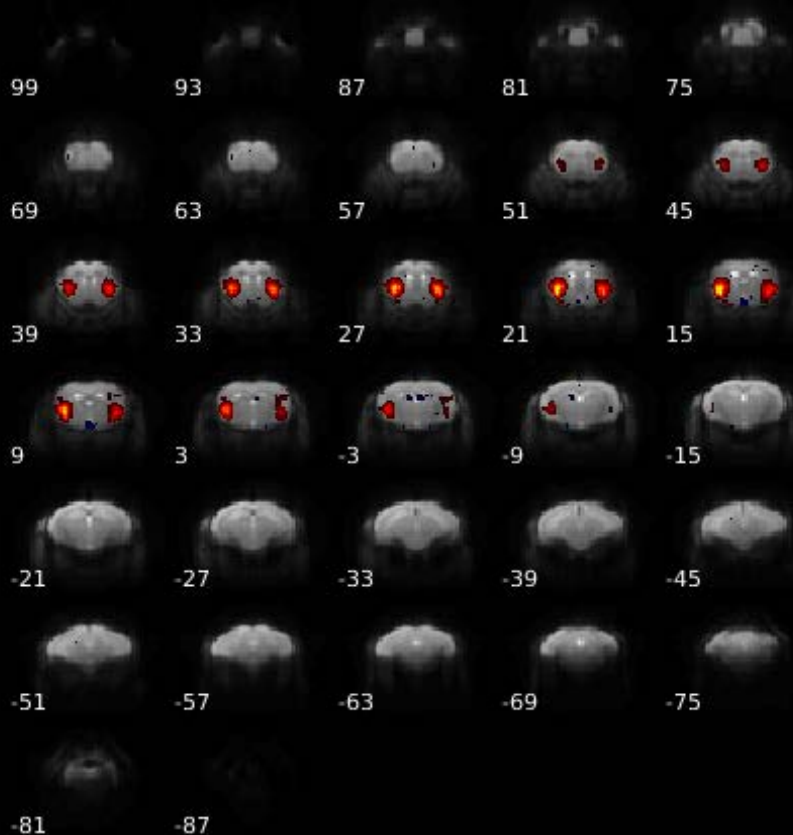

Peak Coordinates (mm)  
(-54,66,15)

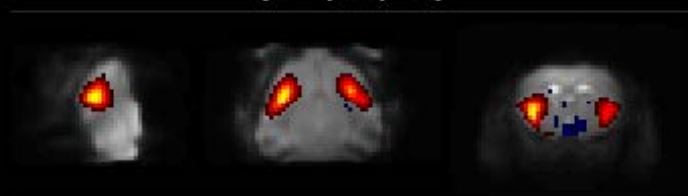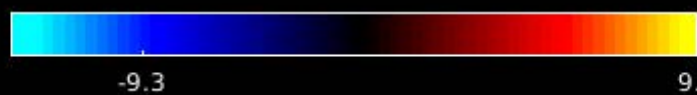

### Component 067

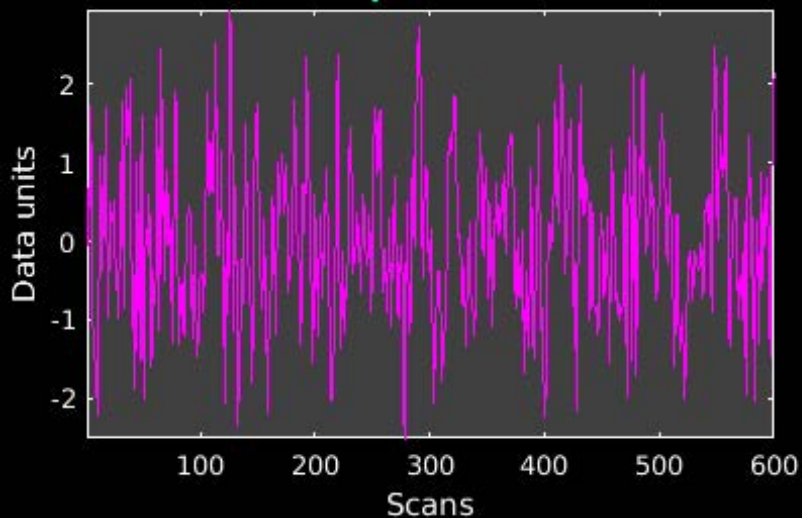

Dynamic range: 0.013,  $\text{Power}_{\text{LF}}/\text{Power}_{\text{HF}}$ : 1.430

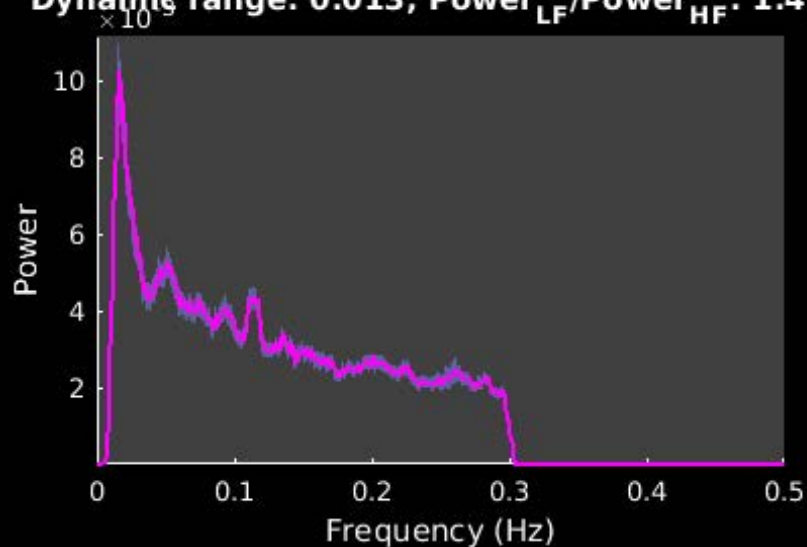

### IVA\_100ICs\_mean\_component\_ica\_s\_all\_67

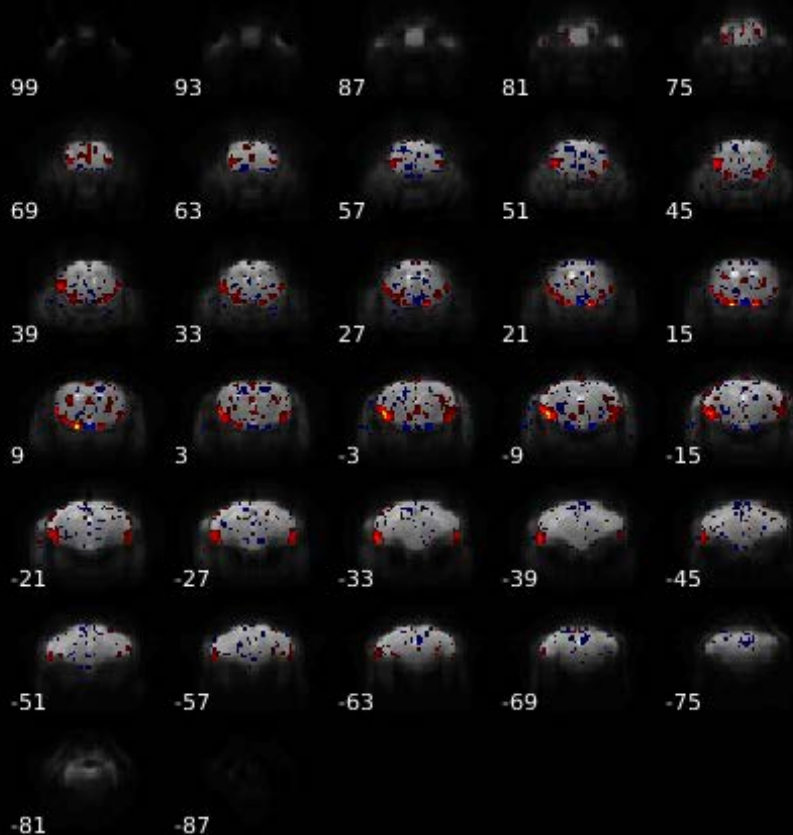

Peak Coordinates (mm)  
(-78,60,-9)

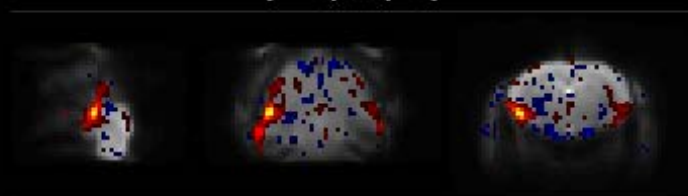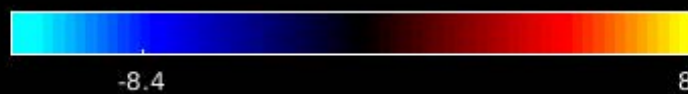

### Component 002

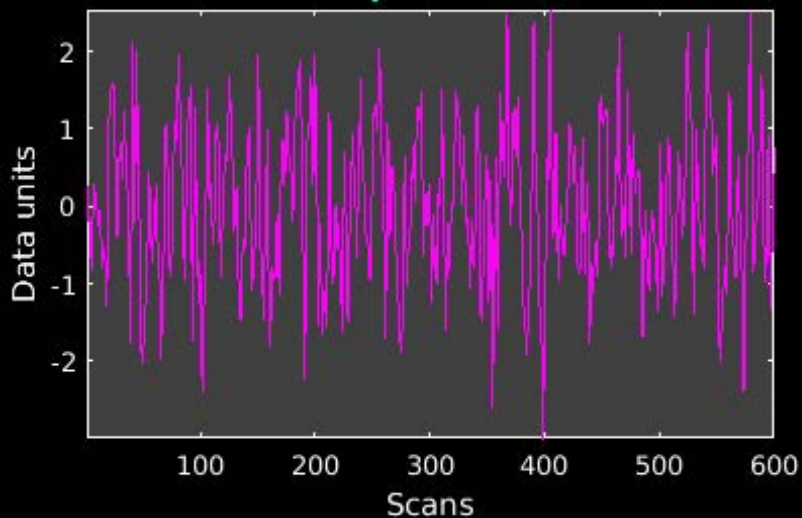

Dynamic range: 0.015,  $\text{Power}_{\text{LF}}/\text{Power}_{\text{HF}}$ : 3.546

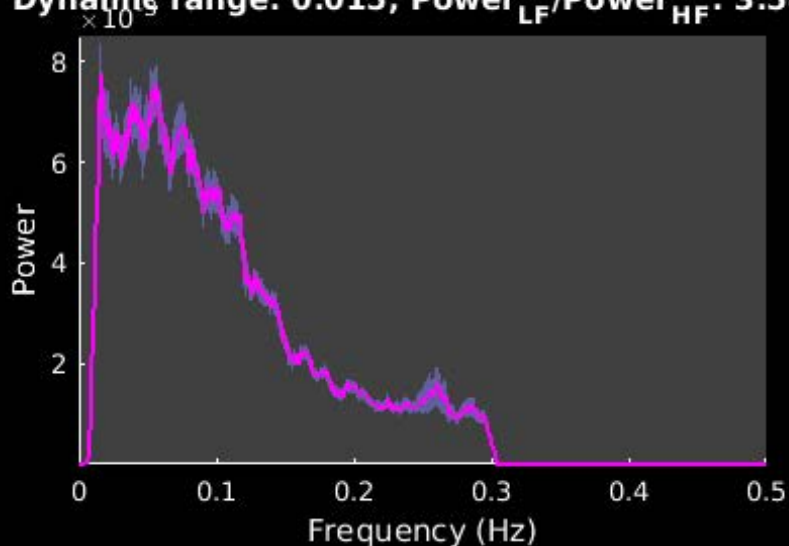

### IVA\_100ICs\_mean\_component\_ica\_s\_all\_2

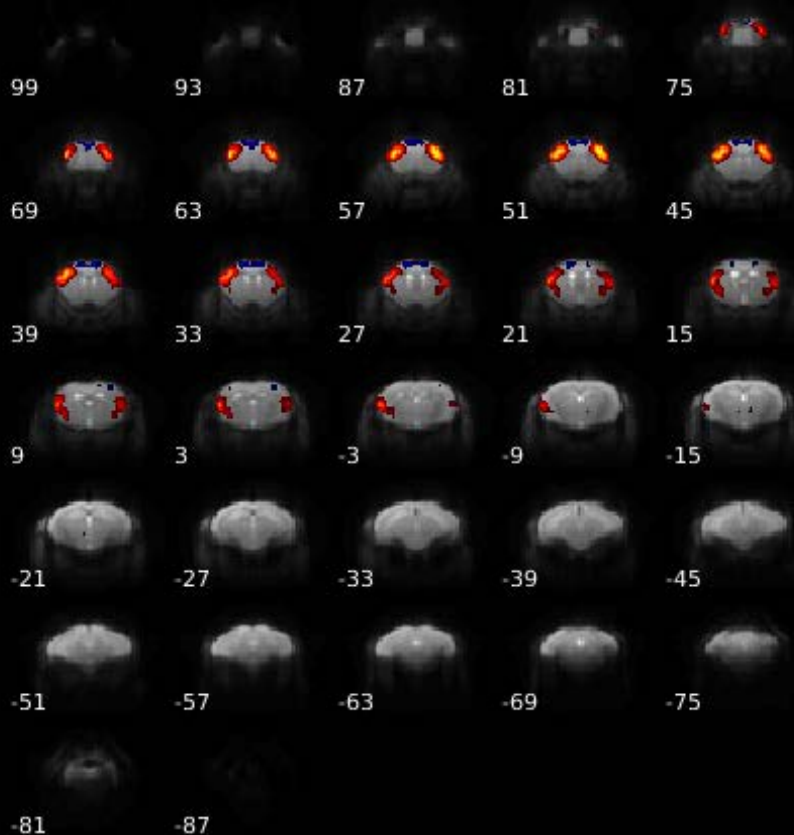

Peak Coordinates (mm)  
(42, 102, 51)

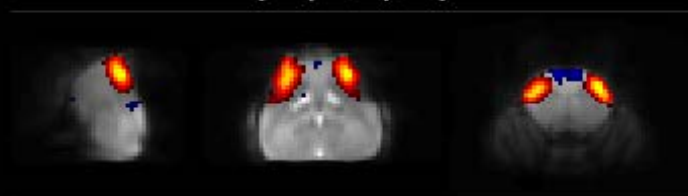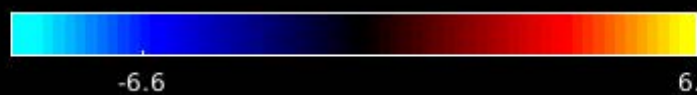

### Component 018

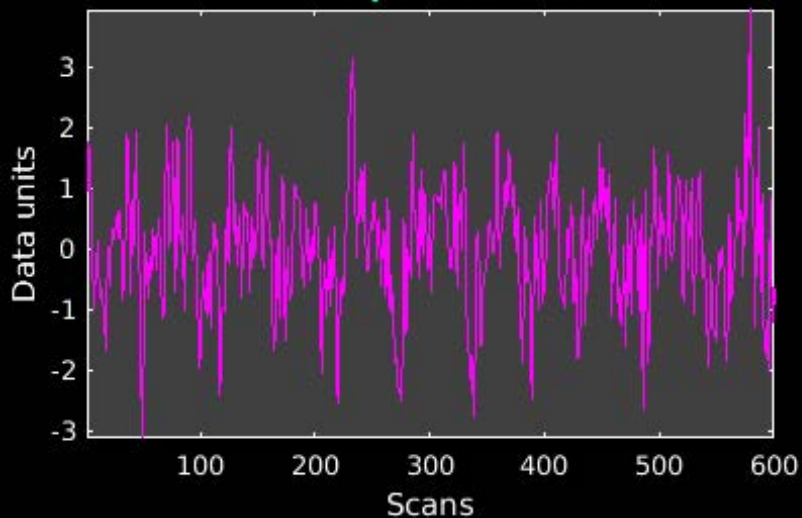

Dynamic range: 0.033,  $\text{Power}_{\text{LF}}/\text{Power}_{\text{HF}}$ : 3.416

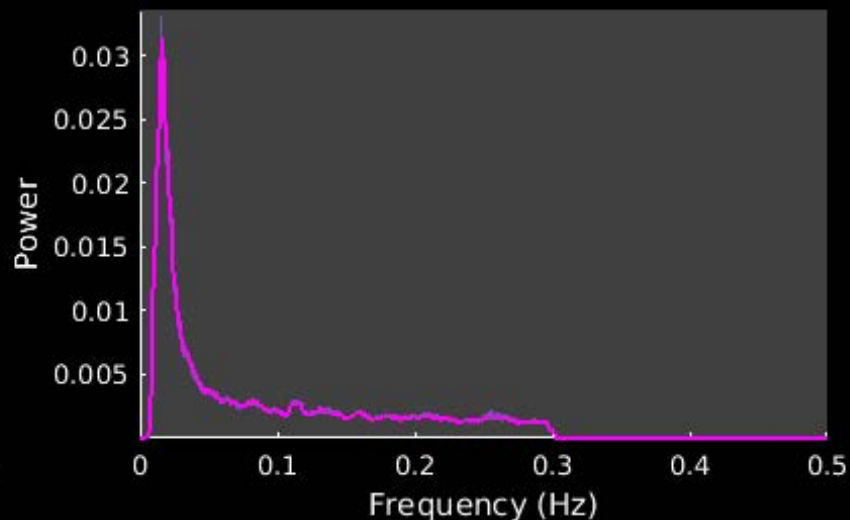

### IVA\_100ICs\_mean\_component\_ica\_s\_all\_18

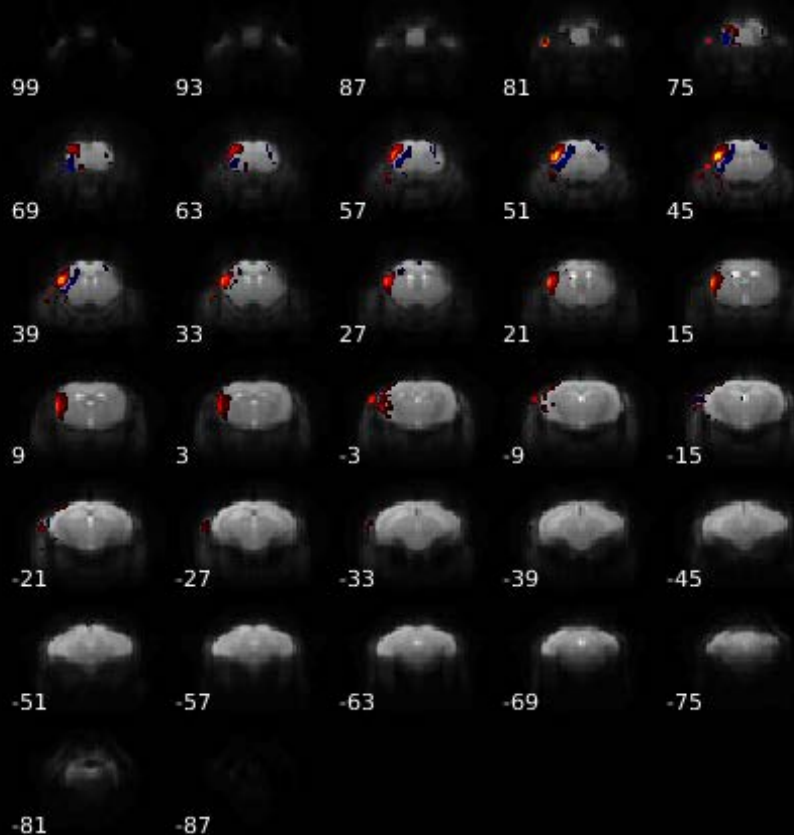

Peak Coordinates (mm)  
(-60,90,51)

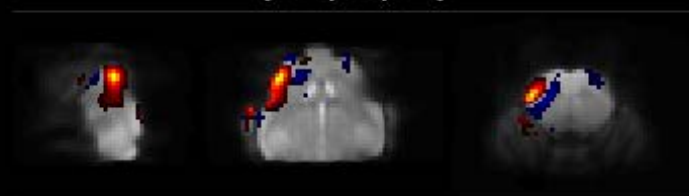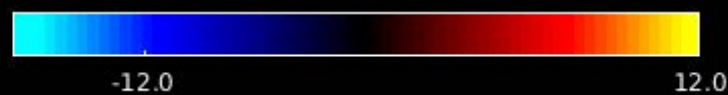

### Component 045

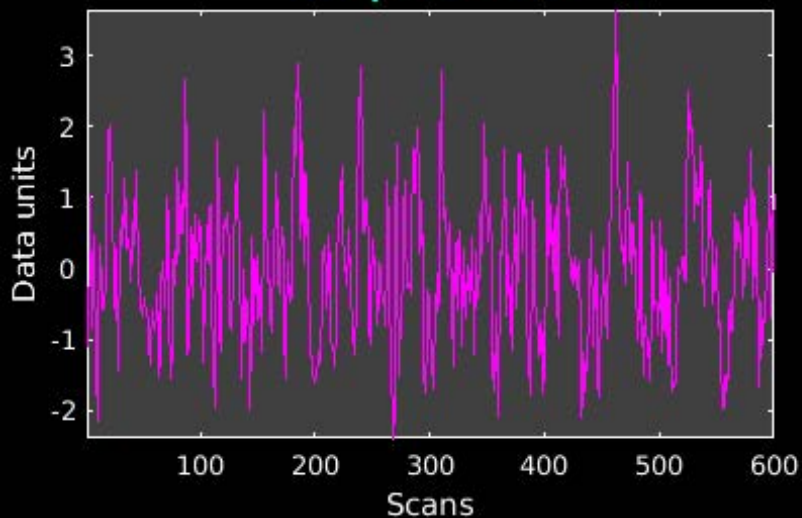

Dynamic range: 0.029,  $\text{Power}_{\text{LF}}/\text{Power}_{\text{HF}}$ : 3.050

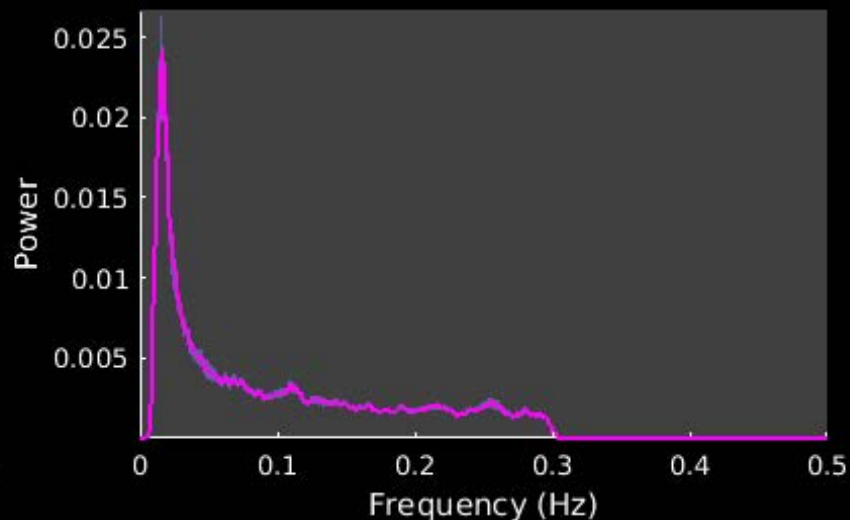

### IVA\_100ICs\_mean\_component\_ica\_s\_all\_45

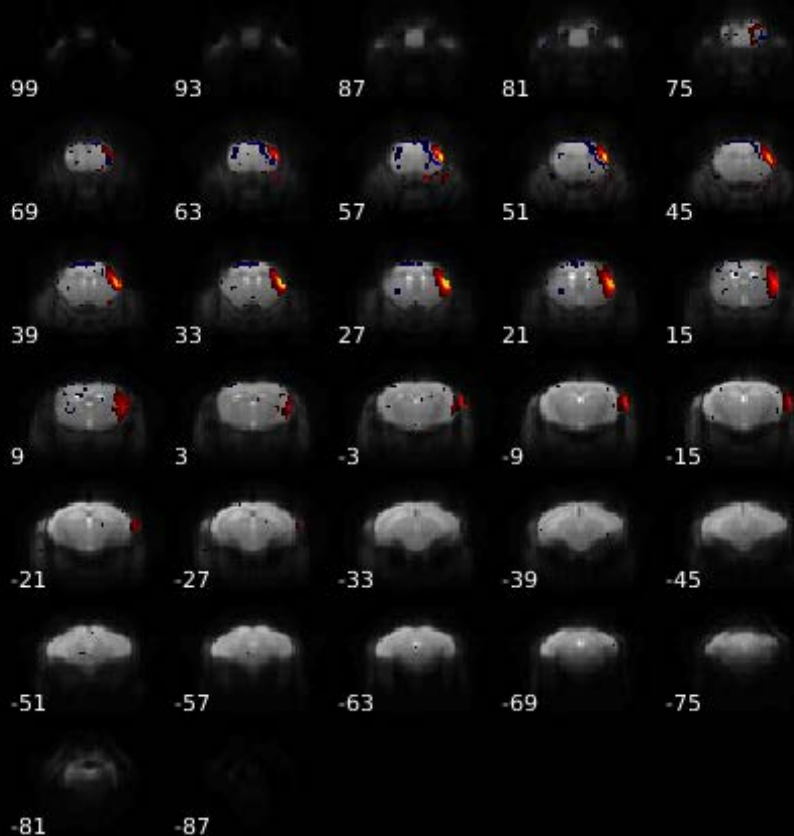

Peak Coordinates (mm)  
(72,78,27)

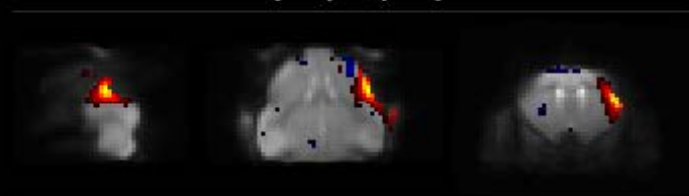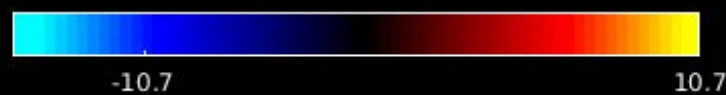

Supplement: 40478_2020_1098_MOESM1_ESM.pdf [file 40478_2020_1098_MOESM1_ESM.pdf]
